# Supplementary material for: A retrospective cohort study of clinical characteristics and outcomes of type 2 diabetic patients with kidney disease
Source: PeerJ. 2024 Feb 19;12:e16915. doi: 10.7717/peerj.16915 (PMC10883152; doi:10.7717/peerj.16915)
Supplement: Data S1 — All patients who enrolled in the inclusion criteria. These data were used for statistical analysis to compare the clinical characteristics and kidney outcomes. [file peerj-12-16915-s003.xlsx]

## Sheet: sheet1
group	follow-time/month	Glucocorticoid	Immunosuppressant	RAAS	Insulin	Gender	Age	Date of admission	the duration of T2DM/month	DR	cigarette	Family history of T2DM	cardiovascular diseases	SBP_1	DBP_1	MBP	renal puncture time	WBC（109L）	neutrophil	lymphocyte	RBC1012L	Hb（gL）	PLT109L	ESR（mmh）	urine sediment erythrocytes	urine sediment leukocytes	urinary protein	24h urie protein	24-hour urine protein>3.5g	Urine albumin/creatinine	hCRP	ALT（UL）	AST（UL）	TPgl	ALBgl_1	TCmmoll_1	TG（mmoll）_1	HDL（mmoll）_1	LDL（mmoll）_1	K（mmoll）	Na	Cl	Ca	BUNmmolL_1	Scr（umoll）_1	UAumolL_1	HCO3_1	eGFR_1	hypoglycemia
DN	16.4446	0	0	1	0	male	39	2016-06-30	0	0	0	0	0	169	107	128	2016-07-04	6.95	58.6	34.5	5.52	162	255	#NULL!	12	10	#NULL!	1434	2	#NULL!	#NULL!	86	40	78.5	49.2	4.54	3.59	0.96	2.63	3.75	141.1	102.4	2.32	4.1	82	616	22.3	91.2	7.25
DN	49.5667	0	0	1	1	female	53	2017-01-05	84	0	0	0	0	117	75	89	2017-01-09	5.21	71	21.7	3.87	105	154	#NULL!	29	6.3	311	1464.4	2	135.2	#NULL!	13	20	72.9	40.9	2.58	#NULL!	#NULL!	#NULL!	4.93	139.8	99.6	2.32	8.9	63	407	24.3	97.1	9.06
DN	16.4446	0	0	1	0	female	53	2017-06-01	6	1	0	0	0	165	82	110	2017-06-08	7.58	56	32.6	3.39	99	213	51	50.2	3.9	1128	1950.2	2	840.1	#NULL!	47	35	68.5	35.5	3.68	1.16	0.9	2.46	4.05	138.4	101.6	2.39	6.4	84	444	23.4	68.6	6.24
DN	34.5	0	0	1	1	male	52	2017-08-30	144	0	0	0	0	162	95	117	2017-09-04	4.83	58.6	29.4	3.49	103	81	#NULL!	14.9	10.2	3141	7281.9	1	3557	#NULL!	86	77	58.5	27.9	3.92	1.85	0.78	2.42	4.17	138	103	2.06	8.82	131	494.8	27.7	53.5	9.87
DN	41.2	0	0	1	0	female	54	2017-10-12	48	0	0	0	0	127	94	105	2017-10-16	6.56	49.9	43.8	4.52	133	215	14	34	22	1231	1048.3	2	1251	#NULL!	49	30	78	44.4	6.34	9.04	1.17	2.6	3.74	136.6	99.8	2.44	5.39	51	310.3	19.3	105	16.48
DN	34.3667	0	0	1	0	male	43	2018-01-03	3	1	0	1	0	168	110	129	2018-01-08	9.41	69	25.3	4.12	129	213	#NULL!	41	9	6421	8283.6	1	4203.3	#NULL!	11	16	68.6	35	4.97	8.24	0.86	1.96	4.06	137	101.2	2.34	9.9	144	386	22.8	50.9	13.68
DN	28.8667	0	0	1	0	male	38	2018-04-18	1	0	1	0	0	140	108	119	2018-04-19	8.29	65	29.2	5.45	168	275	#NULL!	23.9	#NULL!	#NULL!	3609.68	#NULL!	3011.28	#NULL!	71	31	74.6	48	6.57	3.51	1.24	4.36	4.03	141.5	100.3	2.45	3.8	77	487	24.7	109.4	6.94
DN	34	0	0	1	1	male	53	2018-04-09	36	1	1	0	0	147	123	131	2018-04-26	5.67	56.2	35.1	4.88	140	133	#NULL!	10.6	3.8	#NULL!	4119	1	3011.28	#NULL!	31	36	76.1	45.8	3.34	4.9475	1.1125	2.595	3.94	138	100.6	2.33	9	92	307	24.5	81.5	11.1475
DN	16.7333	0	0	1	1	male	35	2018-07-16	0.25	0	1	1	0	131	89	103	2018-07-19	7.14	72.2	15.7	5.12	165	210	#NULL!	10	10	620	987.8	2	606.6	#NULL!	56	30	73.9	45.5	5.44	7.02	0.87	1.64	4.19	136.6	98.2	2.47	4.8	73	496	21.4	114.2	19.37
DN	30.6667	0	0	1	0	female	30	2018-07-26	24	1	0	0	0	136	78	97	2018-07-30	9.32	74.8	19.2	3.67	107	352	23	47.6	34.4	11831	8927.5	1	5984.2	#NULL!	20	25	58.9	31.2	4.23	1.02	1.48	2.42	4.12	142.5	109.8	2.15	6.39	84	250.4	21.9	80.6	4.6
DN	16.4446	0	0	0	0	female	33	2018-10-23	0	0	0	0	0	134	92	106	2018-10-29	7.18	63.7	31.5	4.24	120	222	#NULL!	23.5	257.4	889	640.3	2	565.2	#NULL!	51	54	81.1	50.8	6.31	12.25	0.87	1.97	4.09	137.5	99.9	2.41	6.51	47	384.8	22.4	125	6.66
DN	16.4446	0	0	1	0	female	58	2018-11-13	96	0	0	0	0	136	53	81	2018-11-15	5.74	58.9	35.4	4.16	120	184	16	5.2	3.5	1079	967.2	2	937.1	1.7	19	19	71.3	43.8	5.25	3.6	0.86	2.49	3.98	141.2	102.9	2.37	4.4	69	452	23.3	84	10.74
DN	16.7333	0	0	1	1	male	41	2019-01-15	0	1	1	1	0	178	116	137	2019-01-22	6.17	78.7	14.7	4.54	128	260	58	94.8	10	5444	7692	1	8379.6	#NULL!	16	20	60.6	29.9	9.28	6.3	1.13	4.89	3.81	137.3	96.9	2.19	9.3	204	384	28.1	33.9	16.31
DN	40.5333	0	0	1	0	male	26	2019-03-05	#NULL!	#NULL!	0	0	0	116	71	86	2019-03-07	12.42	68.2	23.4	6	177	320	#NULL!	3.7	1.1	597	2488.12	#NULL!	589.9	#NULL!	63	25	80.9	44.5	5.1	5.55	0.9725	3.3025	3.67	139.1	100	2.48	7.1	161	511	24.7	50.1	12.2525
DN	41.5667	0	0	1	0	male	67	2019-03-29	120	0	0	0	0	157	96	116	2019-04-01	6.28	59.2	34.1	4.3	131	260	9	2.4	0.7	#NULL!	664.8	2	2385.12	0.9	15	17	75.6	47.1	5.56	0.91	1.28	3.85	3.61	139.2	100.3	2.42	9.63	119	455.4	25.5	54.1	6.84
DN	21.3667	0	0	1	1	male	62	2019-04-15	180	1	0	1	0	140	80	100	2019-04-17	6.93	67	21.4	4.62	147	249	6	6.5	7	571.6	628.5	2	426.6	#NULL!	16	21	67.2	39.1	4.35	11.39	0.62	1.98	5.02	143.5	105.3	2.21	5.03	103	354.4	25.7	66.8	15.12
DN	26.9667	0	0	1	1	male	53	2019-04-16	216	1	1	0	1	111	74	86	2019-04-18	7.73	65.7	25	4.11	119	342	92	25.7	2.1	#NULL!	4408	1	1051.47	#NULL!	12	19	65.3	31	6.06	9.71	0.77	1.62	4.45	133.3	99.1	2.18	7.7	112	411	24.3	64.3	20.68
DN	38.3	0	0	1	0	male	37	2019-05-05	8	0	1	0	0	118	75	89	2019-05-06	8.72	48.1	39.2	5.27	151	289	2	4.3	5.1	395	2723.78	#NULL!	144.4	#NULL!	32	21	71.5	44.1	5.5	15.18	0.82	0.85	4.14	137.3	97.8	2.29	6.62	66	401	20.5	117.4	6.56
DN	6.23333	0	0	1	0	male	46	2019-05-22	24	0	1	0	0	121	88	99	2019-05-23	9.4	52.7	38.8	6.18	188	373	#NULL!	31	596.5	#NULL!	880	2	1009.67	#NULL!	30	17	81.2	47.5	6.25	9.19	0.93	2.62	3.29	139.4	97.8	2.59	5.69	88	301.8	25.9	90.4	5.41
DN	15.1333	0	0	1	1	male	56	2019-07-04	120	0	0	0	0	169	85	113	2019-07-10	5.84	61.9	22.9	4.67	139	184	10	17.2	4.8	3539	4978.6	1	3045	2.4	15	18	64.2	37.6	2.85	2.09	0.75	1.44	4.35	137.3	102.9	2.32	8.6	163	352	22.6	40	21.18
DN	18.5	0	0	1	0	male	38	2019-07-26	6	0	0	0	0	108	82	91	2019-07-29	6.05	54.2	35.4	4.37	137	315	7	0.6	1	464	915.2	2	422.7	1.1	46	36	76.9	48.4	3.71	2.96	0.84	2.03	4.28	138.5	99.3	2.34	4.9	94	294	25	88.3	7.87
DN	13.3667	0	0	1	1	male	61	2019-08-26	6	0	1	0	0	161	92	115	2019-08-27	4.7	68.1	23.4	3.43	105	160	28	72.5	2.9	1623	3428.2	#NULL!	1658.9	1.2	11	18	60.3	35.4	4.46	2.03	0.89	2.98	3.69	139.8	100.9	2.16	9.1	89	320	27.7	80.2	16.28
DN	14.8	0	0	1	1	male	54	2019-08-14	240	1	0	0	1	128	91	103	2019-08-29	4.45	47.9	38	3.35	105	185	#NULL!	16.1	3.2	#NULL!	2319	2	1857.72	0.1	29	38	59.3	29.3	3.94	1.74	0.72	2.58	3.43	141.3	102	2.1	4.6	138	361	26.9	49.6	6.4
DN	16.4446	0	0	1	1	male	57	2019-09-24	120	0	0	0	0	113	73	86	2019-09-26	5.3	65.8	28.3	4.28	124	170	13	10.5	1.5	1604	3438.53	#NULL!	1552.7	2.2	15	17	57.5	38	5.49	13.35	0.61	1.14	4.65	137.4	101.9	2.26	9.33	115	456	24.4	60.5	9.45
DN	14.9667	0	0	0	0	female	62	2019-10-30	#NULL!	0	0	0	1	179	108	132	2019-11-12	8.74	65.2	26.8	3.33	99	274	#NULL!	3	11	883	3438.53	#NULL!	3796.6	#NULL!	5	10	65.1	29.9	5.9	4.6625	0.9775	2.1775	4.91	140.4	101.5	2.37	7.1	131	444	23	37.6	11.56
DN	30.5	0	0	0	0	male	43	2019-11-29	60	0	1	1	0	140	103	115	2019-12-12	7.9	62.6	29.5	5.6	174	206	#NULL!	1.2	4	#NULL!	3438.53	#NULL!	3315.15	#NULL!	114	59	63.8	39.8	2.78	4.6625	0.9775	2.1775	4.41	139.4	100.5	2.11	4.1	104	260.2	23.6	75.4	11.56
DN	16.4446	0	0	1	1	male	50	2020-01-15	1	1	1	0	0	101	73	82	2020-01-16	6.89	82	8.7	3.29	97	156	35	6.6	4.7	#NULL!	3438.53	#NULL!	3315.15	18.6	14	13	55.9	30.4	3.55	1.08	1.34	2.01	4.11	139.4	106.1	2.02	6.77	91	356.8	22	84.4	23.12
DN	13.4333	0	0	1	1	male	51	2020-05-19	120	1	0	0	0	148	81	103	2020-05-25	4.59	70.8	23.3	3.59	107	202	36	88.8	8.3	#NULL!	5500	1	3315.15	0.6	13	17	48.2	23	5.07	2.48	1.24	2.98	4.35	137.5	102.3	2.04	10.35	137	478.6	23.2	51.1	13.0875
DN	5.2	0	0	0	1	male	49	2020-05-27	36	0	1	0	0	153	83	106	2020-06-02	5.59	66.5	21.3	2.17	65	158	71	36.25	#NULL!	#NULL!	5019.9	1	3315.15	#NULL!	11	17	39.9	19.8	3.6	0.98	0.65	2.55	6.32	142.8	112.9	1.75	20.6	356	269	19.8	16.3	7.27
DN	9	0	0	1	1	female	58	2020-05-30	60	0	0	1	0	130	75	93	2020-06-09	12.29	73.1	16.2	3.9	110	324	98	36.25	#NULL!	#NULL!	4956.38	#NULL!	3315.15	42.9	11	15	72.3	33.7	4.61	1.66	0.65	3.54	4.2	139.1	103.6	2.11	6	134	421	25.9	37.6	12.51
DN	7.8	0	0	0	1	male	54	2020-06-11	60	1	1	0	0	181	99	126	2020-06-16	7.35	69.6	21.2	2.97	85	190	67	36.25	#NULL!	#NULL!	4956.38	#NULL!	3315.15	#NULL!	#NULL!	#NULL!	#NULL!	28.525	5.0525	2.66	0.775	3.29	#NULL!	#NULL!	#NULL!	#NULL!	9.9	169.5	360.25	22.675	49.35	11.51
DN	2.73333	0	0	1	1	female	57	2020-07-10	120	1	0	0	1	160	91	114	2020-07-13	6.14	70.8	21.2	4.17	117	173	80	36.7	454.5	5672	7502	1	6887.2	0.9	11	14	60.7	26.5	6.81	4.01	0.93	4.04	3.98	137.2	101.8	2.23	7.5	115	345	22.8	45.6	19.46
DN	24.4333	1	1	0	1	male	54	2020-07-15	36	#NULL!	0	0	0	137	90	106	2020-07-16	7.09	50.9	26.2	4.38	142	194	2	12.9	3.7	1790	1803.6	2	1024.1	0.2	11	20	59.7	34.1	5.19	3.99	0.87	3.03	3.94	141.4	106.2	2.07	5.5	73	406	22.2	97.9	8.31
DN	7	0	0	1	1	male	49	2020-08-01	72	#NULL!	1	1	0	100	72	81	2020-08-04	5.19	48.9	35.5	3.96	122	179	12	20.2	#NULL!	120	89.1	2	12.9	#NULL!	16	16	69.1	39	4.03	2.22	0.9	2.71	4.24	138.4	102.5	2.21	9.4	121	326	19.7	60.2	11.16
DN	10.0667	0	0	1	1	male	50	2020-08-03	216	0	1	0	1	160	90	113	2020-08-11	4.83	65.1	19	3.92	112	164	#NULL!	20.2	#NULL!	1566	2473	2	3461.2	#NULL!	17	17	57.4	28.3	2.91	1.65	0.88	1.43	3.83	141.9	102.9	2.18	5.8	231	377	24	26.6	7.53
DN	14.8	0	0	0	1	male	48	2020-09-07	12	0	1	0	0	133	90	104	2020-09-08	6.69	55.2	34.4	5.6	170	226	2	20.2	#NULL!	1091	533.6	2	362.1	#NULL!	15	15	72.7	39	3.82	3.28	0.73	2.31	3.91	140.2	102.7	2.21	4.9	69	358	24.4	106.7	8.53
DN	5.7	0	0	1	0	male	31	2020-09-07	12	0	1	0	0	149	95	113	2020-09-09	7.52	58.7	33.2	4.75	146	272	#NULL!	20.2	#NULL!	1083	1548	2	584.5	#NULL!	54	39	67.4	40.8	5.52	12.91	0.8525	2.0575	4.08	137.8	100.1	2.24	4	60	347.5	23.1	127.1	20.44
DN	16.4446	0	0	0	0	male	49	2020-11-17	24	1	0	1	0	140	91	107.333	2020-11-18	5.76	56	31.8	3.4	99	199	28	3.9	6.2	65	110.5	2	206.2	3.5	21	18	71.8	39.8	2.84	1.4	1.04	1.64	5.22	138.5	107.7	2.23	13.3	199	451.9	19.5	33	6.25
DN	17.5667	0	0	0	1	male	62	2020-11-29	180	1	0	0	0	129	85	99.6667	2020-11-25	6.93	56.6	3.93	4.67	128	214	26	16.325	#NULL!	537	1127.7	2	625.3	#NULL!	32	23	69.5	35.5	5.03	4.38	0.76	2.85	4.53	136.4	103.2	2.27	11.2	162	512	20.5	38.6	11.28
DN	2.73333	0	0	1	1	male	59	2020-12-03	18	1	0	0	0	131	90	103.667	2020-12-09	7.48	70	17.6	3.2	103	325	18	27.3	74.8	1721	5163	1	5024.1	1.3	48	44	43.6	24.2	3.31	1.49	1.17	1.75	4.47	138.8	102.4	2.09	14.6	152	338.8	31.9	42.6	12.54
DN	16.4446	0	0	0	1	male	36	2020-12-09	120	1	0	0	0	120	79	92.6667	2020-12-14	5.14	67.2	17.1	2.93	83	85	93	21.2	9.3	2444	9287.2	1	4727.6	13.2	23	41	50.7	21.5	4.33	1.45	1.31	2.55	3.54	139.1	98.3	2.01	15.49	327	383.9	27.7	19.8	9.73
DN	18.3333	0	0	0	#NULL!	male	44	2021-01-27	264	#NULL!	0	0	0	129	85	99.6667	2021-01-28	5.63	49.9	39.8	4.99	147	251	#NULL!	44.3	#NULL!	#NULL!	7603.82	#NULL!	1204.3	#NULL!	19	24	68.3	37.1	6.31	2.72	1.16	3.93	4.33	138.4	101.8	2.28	11.2	96	464	24.4	82.5	10.48
DN	7.66667	0	0	0	#NULL!	male	39	2021-03-06	2	1	0	0	0	166	100	122	2021-03-11	4.79	46.1	45.1	3.2	89	208	82	95.3	7.6	1730	3633	1	4781.7	#NULL!	22	28	49.9	23.2	6.89	2.4875	1.85	3.1725	4	140.8	105.7	1.95	8.22	85	423	26.9	99	8.5325
DN	1.6	0	0	1	1	male	65	2021-03-12	#NULL!	#NULL!	0	0	1	168	97	120.667	2021-03-15	7.91	59.6	29.2	4.31	132	235	46	41.3	#NULL!	3737	12332.1	1	4434.8	#NULL!	10	21	61.1	31.5	8.76	5.41	1.21	5.14	4.33	141.4	104.1	2.34	7.28	179	414	28.2	33.5	6.5
DN	8	0	0	1	1	male	42	2021-03-10	1	1	0	0	0	110	77	88	2021-03-15	6.49	72.6	19.6	3.51	96	339	82	33.4	3.8	2210	7735	1	7276.3	0.4	32	26	65.1	35.9	5.94	0.37	3.72	1.07	5.71	141.1	106.6	2.35	20	82	334	24.5	101.2	7.42
DN	1.2	0	0	1	1	male	65	2021-03-15	120	#NULL!	0	0	0	169	78	108.333	2021-03-25	7.17	75.1	15.9	3.73	110	313	#NULL!	54.55	#NULL!	2622	4719.6	1	5249.9	#NULL!	22	30	65.8	28.3	4.74	1.67	1.14	3.16	5.62	133.9	105.3	2.07	11	240	348.6	22.5	23.5	5.37
DN	10.9333	0	0	0	1	female	57	2021-03-28	60	#NULL!	0	0	0	200	102	134.667	2021-03-29	5.92	70.7	18.9	3.07	79	353	#NULL!	54.55	#NULL!	5263	6315.6	1	6249.3	#NULL!	25	28	49.3	23.1	7.16	2.02	1.75	4.51	4.03	145.3	111.9	2.02	6.01	168	332.1	24.2	28.8	7.06
DN	15.2333	0	0	0	0	male	42	2021-04-18	156	#NULL!	0	0	0	129	75	93	2021-04-22	7.24	62.6	24.4	3.39	110	184	40	15.3	10	2391	3347.4	2	1154.8	1.4	16	17	65.6	33.7	4.95	3.22	1.1	2.73	4.26	140.2	103.9	2.35	9.5	95	345	25.2	84.7	12.97
DN	15.4	0	0	0	1	female	63	2021-05-26	60	1	0	0	0	147	103	117.667	2021-05-31	4.21	63.8	25.7	4.17	123	179	25	40.825	#NULL!	71	106.5	2	11.1	#NULL!	25	22	78.3	44.4	4.57	1.66	1.19	2.84	4.04	140.7	106.4	2.37	8.9	117	378	20.8	42.8	7.56
DN	0.8	0	0	1	1	male	57	2021-07-06	#NULL!	#NULL!	0	0	0	131	89	103	2021-07-08	4.76	68.3	22.1	3.78	114	110	19	40.825	#NULL!	560	784	2	432.9	1.1	16	15	69.8	42.1	4.34	3.94	0.84	2.6	4.44	138.1	106.8	2.2	10.28	182	591.6	19	34.7	8.89
DN	12.2	0	1	1	1	male	57	2021-07-10	240	#NULL!	1	0	1	110	70	83.3333	2021-07-15	9.55	57.9	32.5	4.31	126	239	#NULL!	40.825	#NULL!	2728	4774	1	2421.2	#NULL!	21	23	66.8	33.4	5.09	3.92	0.61	3.16	3.97	136.7	101.7	2.17	10.31	175	387.9	23	36.4	9.46
DN	8.96667	0	0	1	1	male	39	2021-08-20	4	#NULL!	0	0	0	159	109	125.667	2021-08-26	7.33	54.4	30.7	5.16	147	280	3	40.825	#NULL!	368	846.1	2	316.8	0.6	27	21	73.2	44.7	4.2	3.43	0.76	2.39	3.85	141.2	103.1	2.37	4.4	95	497	23	86.5	5.93
DN	9.93333	0	0	0	1	male	34	2021-10-24	48	#NULL!	0	0	0	168	96	120	2021-11-01	5.58	71.6	21	3.3	99	193	23	40.825	#NULL!	555	1276.5	2	669.2	5.7	23	19	72.7	45.5	5.01	5.99	0.92	2.26	6.15	138.3	105.7	2.13	10.7	188	516.1	19.3	39.3	9.99
DN	1.13333	0	0	1	1	male	31	2021-11-11	60	1	1	0	0	130	85	100	2021-11-15	11.02	56.7	34.5	4.52	134	304	#NULL!	40.825	#NULL!	1587	3174	2	903.2	1	15	18	66	40.2	4.51	4.83	0.91	1.93	4.84	138.4	104.3	2.34	9.95	166	510.5	21.2	46.6	8.51
DN	16.4446	0	0	1	0	male	51	2021-11-07	12	1	0	0	0	126	76	92.6667	2021-11-15	6.12	74.4	18.8	4.66	131	213	#NULL!	74.2	5.9	3783	6809.4	1	2504.9	1.5	11	11	63.2	33.9	6.5	3.16	0.88	4.55	3.96	144.1	105	2.13	9.2	172	402	27	38.8	7.86
DN	8.66667	#NULL!	#NULL!	#NULL!	#NULL!	male	60	2021-11-15	6	#NULL!	0	0	0	176	81	112.667	2021-11-17	4.66	63.6	20.2	3.65	115	153	36	36.375	#NULL!	3481	3829.1	1	3252.1	17.5	7	14	60.7	28	4.49	1.78	0.86	2.41	5.12	139.3	109.5	2.08	15.8	266	502.6	20.1	21.5	6.14
DN	3.66667	0	0	0	1	male	42	2021-11-21	108	#NULL!	0	0	0	112	86	94.6667	2021-11-22	6.83	53.9	30.2	5.11	154	268	12	36.375	#NULL!	111	333	2	343.2	1.9	91	87	73.3	40.7	4.44	0.8	1.54	2.53	3.65	142.5	98.9	2.2	7.5	84	538	28.5	98.3	7.35
DN	4.33333	0	0	1	1	female	39	2021-12-10	24	#NULL!	0	0	0	116	73	87.3333	2021-12-13	4.86	42.8	50.2	3.81	119	195	6	36.375	#NULL!	270	594	2	285.68	0.6	21	23	62.6	34	4.84	4.69	1.19	2.71	4.3	141.1	105.4	2.2	8.1	37	213	24.7	129.7	7.54
DN	16.4446	0	0	0	1	female	37	2021-12-18	24	1	0	1	0	127	75	92.3333	2021-12-20	14.09	80.2	11.9	3.88	120	254	#NULL!	40.4	22.6	1550	2945	2	1671.2	0.8	#NULL!	11	66.6	31.7	5.6	2.48	1.24	3.57	4.47	137.7	104.5	2.16	10.3	98	396	22.2	63.7	10.16
DN	16.4446	#NULL!	#NULL!	#NULL!	#NULL!	female	61	2021-12-22	240	#NULL!	0	0	0	149	76	100.333	2021-12-27	6.92	72	20.8	3.55	101	248	67	15.6	187.8	1268	2916.4	2	8546.8	6.5	14	17	49.8	21.6	7.28	1.81	1.31	5.14	3.47	140.9	104.7	1.97	3.9	56	213	26.2	96.9	16.41
DN	16.4446	0	0	#NULL!	#NULL!	male	34	2022-01-18	84	#NULL!	0	0	1	135	79	97.6667	2022-01-24	10.81	65.4	27.2	3.75	106	166	#NULL!	47.075	#NULL!	#NULL!	7706.12	#NULL!	303.2	#NULL!	12	11	69.3	34.9	6.27	4.02	0.86	3.76	4.91	136.3	87.4	2.43	26.9	827	354	19.7	6.5	13.515
DN	5.66667	0	0	1	0	male	57	2022-03-08	180	#NULL!	0	0	0	189	107	134.333	2022-03-14	6.37	76.6	14.1	3.58	105	163	#NULL!	12.9	3.9	8783	11857	1	8573.6	#NULL!	22	29	49.1	26.8	3.52	0.99	1.07	1.71	4.15	142.5	109	1.98	12.09	237	408.7	25.1	25.2	7.3
DN	16.4446	0	0	1	1	male	50	2022-03-21	24	#NULL!	1	0	0	169	85	113	2022-03-23	9.52	81.2	10.9	2.77	87	425	#NULL!	39.325	#NULL!	6241	13106.1	1	14526	#NULL!	12	15	53	22.7	6.66	3.24	1.9	3.5	4.29	141.2	104.8	1.86	14.9	270	403	22.6	22.7	13.3675
DN	3.13333	0	1	1	1	female	48	2022-04-19	120	1	0	1	0	155	104	121	2022-04-25	7.14	66.4	26.5	4.27	130	259	18	119.4	3.1	3731	5596.5	1	3686.1	0.5	9	11	58.4	29.2	5.21	1.54	1.77	2.66	4.74	136.3	102.4	2.03	6.6	68	390	21.4	91.7	20.19
DN	4.46667	0	0	1	1	male	38	2022-04-20	72	1	1	0	0	149	101	117	2022-04-25	9.52	72.9	18.5	3.15	90	252	#NULL!	38.2	#NULL!	3766	13181	1	7695.3	#NULL!	18	19	44.7	18.5	5.91	1.21	1.14	3.95	4.02	137.9	107.3	1.9	7.8	144	236	23.5	52.7	11.245
DN	0.666667	0	0	1	1	male	54	2022-05-04	72	#NULL!	0	0	0	#NULL!	#NULL!	#NULL!	2022-05-16	5.01	85.4	8.8	2.38	67	150	64	9.4	11	4831	9662	1	3683.5	1.4	15	15	72.6	40.6	3.38	1.79	1.25	1.52	5.6	137.3	105	2.19	21.7	366	336	18.7	15.2	9.57
DN	16.4446	0	0	1	1	female	67	2022-06-04	240	#NULL!	0	0	1	130	80	96.6667	2022-06-07	10.02	64	28	4.16	116	241	40	11.1	38.1	4245	8914.5	1	6283.5	1.4	10	13	61.9	33.3	5.25	8.54	0.97	2.07	3.97	139.7	105.1	2.18	11.3	89	330	24	58	7.92
DN	16.4446	0	0	1	0	male	67	2022-06-14	#NULL!	#NULL!	1	0	0	129	80	96.3333	2022-06-15	6.31	55	34.2	4.25	130	229	#NULL!	14.175	#NULL!	1777	1865.8	2	1093.1	#NULL!	25	24	66.2	38.7	4.42	2.04	1.05	2.79	3.4	143.6	107.7	2.15	8.2	93	326	20.5	72.9	7.66
DN	16.4446	0	0	1	1	male	57	2022-06-13	108	#NULL!	0	0	0	169	92	117.667	2022-06-15	10.08	78.4	11.7	3.81	111	394	#NULL!	14.175	#NULL!	5381	8609.6	1	6086.5	#NULL!	18	21	52.1	27	4.41	1.18	0.83	3.15	3.21	141.5	104	1.98	7.7	152	337	25.1	43.2	5.48
DN	0.466667	0	0	1	1	female	32	2022-07-25	120	1	0	0	0	114	78	90	2022-07-26	5.11	57	34.2	4.19	111	330	79	11.6	6.3	4041	10627.8	1	7636.5	1.9	17	20	65.5	30.4	6.67	2.45	1.37	4.01	4.97	139.1	109.4	2.12	9.9	138	392.8	20.1	43.6	2.46
DN	1.33333	0	0	1	0	female	38	2022-07-25	1	1	0	1	0	138	96	110	2022-07-27	#NULL!	50	37.2	4.99	150	284	2	24.6	42.8	651	651	2	520.4	4.2	29	36	63.7	40.6	4.62	2.02	1.01	3.025	4.36	138.3	104.8	2.37	2.7	66	358	23.4	102	5.43
DN	16.4446	0	0	1	1	male	50	2021-03-02	120	1	0	0	0	149	85	106.333	2021-03-15	4.91	59.7	24.8	4.35	113	129	#NULL!	36.6	4.9	1493	5972	1	2774.1	#NULL!	19	16	64.5	34.6	3.9	1.33	0.83	2.31	4.88	143.6	106.2	2.14	22.4	229	666.8	28.3	27.6	4.72
DN	10.3333	0	0	1	1	female	42	2021-10-15	0.5	#NULL!	0	1	0	147	102	117	2021-10-20	10.06	80	14.1	4.7	89	355	49	20.4	22.9	2328	4423.2	1	3739.5	#NULL!	11	14	69.2	34.3	4.76	2.04	1.01	2.63	4.57	139.2	104.5	2.1	4.42	92	311.5	21.9	66.8	7.48
DN	6.93333	0	0	1	0	male	60	2021-10-26	#NULL!	#NULL!	0	0	0	107	74	85	2021-10-27	6.64	60.9	23.5	4.55	143	216	5	8.2	1.7	319	733.7	2	324	3	34	23	70.7	44.7	4.57	4.03	0.91	2.46	3.66	139.7	101.2	2.24	5.24	96	435.1	26.2	73.7	5.8
NDKD	44.2333	0	1	0	1	female	45	2016-06-13	48	0	0	0	0	96	60	72	2016-06-16	5.02	69.1	21.5	4.2	117	178	75	8.3	12.5	#NULL!	7280	1	1206.17	0.4	10	18	56.3	25.2	7.68	1.81	1.68	4.91	3.79	139	102.6	2.02	3.88	50	244.4	22.9	115.7	6.7
NDKD	19.4333	0	0	1	1	female	61	2016-07-26	48	0	0	0	0	140	87	105	2016-08-04	8.9	60.5	31.8	3.66	112	228	#NULL!	49.2	39.5	#NULL!	4670.2	1	1206.17	#NULL!	11	13	55	26.8	5.75	1.67	1.25	3.77	3.61	139.8	104.9	2.11	4.3	73	296	22.5	70.3	6.7
NDKD	16.4446	0	0	1	0	male	57	2016-08-16	96	0	1	0	0	132	77	95	2016-08-17	6.4	69	18	4.61	141	262	#NULL!	7	0	#NULL!	3460.43	#NULL!	1206.17	#NULL!	21	12	71	43.6	4.54	4.19	1.09	2.7925	4.19	140.9	102.1	2.2	7	114	492	22.3	57.4	7.34
NDKD	60.1333	1	0	0	1	male	51	2016-08-22	120	#NULL!	1	0	0	115	79	91	2016-08-25	6.69	56.5	34.4	4.59	106	213	11	5.1	3.9	897	1295	2	541.9	0.6	27	20	66.9	41.3	3.5	6.03	0.58	1.05	4.87	142.1	107.8	2.24	10.9	199	534.7	18.4	30.9	6.18
NDKD	56.4	1	1	1	0	male	52	2016-10-12	48	#NULL!	0	0	0	120	90	100	2016-10-13	4.4	51.2	36.6	3.64	99	148	#NULL!	924.1	10.1	#NULL!	2150.75	#NULL!	803.025	#NULL!	17	14	74	39.3	3.11	2.29	0.85	1.44	4.6	139.7	105.2	2.28	10.49	149	465.5	22.4	45.8	7.2
NDKD	67.3333	0	1	1	1	male	54	2016-10-24	36	#NULL!	0	0	0	140	106	117	2016-10-26	6.92	59.5	31.8	4.61	154	233	7	99	4.1	271	596.5	2	219.3	2.7	61	39	83.6	46.8	4.32	3.91	0.66	2.19	4.07	140.5	100.2	2.43	7.5	83	432	27	91.7	7.5
NDKD	67.9333	0	0	1	0	male	32	2016-10-24	#NULL!	1	1	0	0	182	130	147	2016-11-03	11.54	55.8	31.5	5.34	150	239	3	4	1.2	#NULL!	2041.3	2	1101.95	1.9	41	22	68.5	40.9	5.81	15.43	0.63	0.98	3.84	137.9	98.3	2.32	4.8	91	414	26.9	95.7	8.43
NDKD	51.7333	1	0	1	1	male	72	2016-10-20	300	0	1	0	0	126	66	86	2016-11-03	8.9	61.8	28.4	4.29	130	227	#NULL!	57	7.4	#NULL!	1971	2	1101.95	#NULL!	16	28	59.5	27.7	5.41	1.65	1.04	3.77	4.55	141.6	107.2	2.17	6.96	108	472	22.6	58.8	8.64
NDKD	13.7	1	0	1	1	female	54	2017-02-15	120	#NULL!	0	0	0	134	74	94	2017-02-23	6.67	61.4	26.7	3.79	108	181	#NULL!	7.7	6.6	#NULL!	2025.2	2	1101.95	#NULL!	16	19	66.9	39.6	4.5	2	1.215	3.1975	4.52	140.4	102.3	2.33	5.8	46	427	23.8	108.6	6.16
NDKD	51.4333	1	0	1	1	female	58	2017-03-06	108	#NULL!	0	0	0	143	75	98	2017-03-09	4.97	57.2	36	3.98	114	179	#NULL!	36.95	#NULL!	#NULL!	3457.9	#NULL!	1101.95	#NULL!	10	16	72.9	41.5	4.09	1.535	1.215	3.1975	4.47	142.9	107.6	2.33	5.9875	94	416.825	23.425	81.9	5.79
NDKD	63	1	0	1	0	female	63	2017-04-10	12	0	0	0	1	170	104	126	2017-04-13	5.8	58.6	36	4.92	138	199	11	21.7	9.4	1135	2012	2	2126.9	#NULL!	7	14	59.7	30.4	6.98	1.53	1.7	5.09	3.81	142.4	106.9	2.16	5.09	73	386.1	22.1	75.8	7.05
NDKD	64.5	1	0	1	1	male	48	2017-04-19	84	0	1	0	0	113	65	81	2017-04-27	4.96	60.5	32.9	4.29	135	177	27	61.4	10	2712	7823.4	1	1519.7	#NULL!	10	20	50	26.2	4.89	0.96	1.49	2.95	4.26	145	112.8	2.07	6.1	92	382.2	25.2	84.4	8.82
NDKD	41.8	1	0	1	0	male	60	2017-05-12	6	0	1	1	1	120	75	90	2017-05-15	4.37	64.8	23.1	4.75	150	198	27	37.9	12	10808	3838	1	3365.9	#NULL!	23	20	48.2	21.3	5.49	1.94	1.11	3.35	3.57	136.5	100.1	1.97	6.12	96	315.5	28	74.2	6.4
NDKD	53.0667	0	0	1	0	male	50	2017-05-22	3	#NULL!	0	0	0	130	89	103	2017-05-25	6.94	70.4	21.5	4.76	150	356	#NULL!	33.2	9.3	395	649	2	130.1	#NULL!	21	20	80.3	43.6	5.18	3.51	0.98	2.97	3.95	143.8	102.7	2.56	5.5	94	509	22.1	81.1	7.6
NDKD	16.4446	0	0	1	0	female	29	2017-06-23	0	0	0	1	0	128	102	111	2017-06-29	6.57	62.5	30.1	4.4	129	265	20	45	11.7	#NULL!	5354.7	1	3372.53	#NULL!	52	54	59.1	38.3	4.82	5.01	1.35	2.46	3.87	141.9	103.8	2.21	3.1	57	285	23.6	120.7	8.18
NDKD	35.7	1	0	0	1	male	60	2017-07-10	36	0	0	0	0	152	92	112	2017-07-13	7.41	55.4	34.5	3.76	117	346	77	57.8	6.7	9283	9596	1	9495	#NULL!	12	17	60.5	26.6	4.79	2.43	1.06	2.28	4.3	143.4	107.5	2.17	7.9	85	390	23.6	85.4	8.54
NDKD	20.2	1	0	1	0	female	60	2017-07-14	36	#NULL!	0	0	0	123	71	88	2017-07-17	5.93	60.4	29.5	3.15	93	264	34	232.3	51.5	386	1348	2	499.1	#NULL!	10	15	72.1	36.3	4.2	0.97	1.23	2.6	4.09	142.3	105	2.36	8.74	86	283	23.6	63.5	7.55
NDKD	17.5667	1	0	1	1	male	63	2017-08-08	156	1	1	0	1	106	69	81	2017-08-16	5.06	60.8	25.1	4.06	127	117	49	801	8.1	7347	8570	1	3730.8	#NULL!	15	17	52.3	25.3	3.51	2	1.16	2.01	4.17	141.3	105.1	1.99	9.2	84	383	21.5	84.8	7.7
NDKD	16.4446	0	0	1	1	female	65	2017-11-07	120	0	0	0	1	141	76	98	2017-11-09	4.3	62.1	25.6	4.57	129	123	#NULL!	6.5	13.5	2013	6467.5	#NULL!	2184.8	#NULL!	21	23	83.2	42.7	4.54	2.92	1.1025	2.445	4.12	140.7	102.5	2.26	9.3	77	354	22.2	70.5	7.38
NDKD	50.7	1	0	1	0	male	63	2017-11-16	72	0	0	0	0	134	90	105	2017-11-23	3.95	57.2	28.4	4.37	118	208	#NULL!	120.3	10.2	#NULL!	9961.6	1	3702.38	1	8	17	40.8	18.1	8.24	3.68	1.1025	2.445	4.41	140.5	105.4	1.91	8.27	89	290.1	27.6	79.1	7.33
NDKD	16.4446	0	0	1	0	female	54	2017-12-01	120	1	0	0	0	117	76	90	2017-12-07	8.94	42.7	47	3.75	117	221	#NULL!	58.8	2.9	1649	5990.4	1	5008.6	#NULL!	24	27	59.6	35.7	5.48	3.48	1.18	3.62	3.9	140.7	102.2	2.17	4	46	404	26.8	108.6	12.84
NDKD	37.1667	1	1	1	1	female	44	2017-12-12	8	#NULL!	0	0	1	155	96	116	2017-12-14	8.65	72.2	19.3	3.45	105	326	48	45.7	12.8	2818	5567	1	3885.3	#NULL!	8	12	52.1	28	4.79	7.55	0.84	1.55	5.26	140.4	106.7	2.03	10.9	177	390	24.8	29.7	8.55
NDKD	40.1667	0	0	1	0	female	68	2018-01-11	#NULL!	#NULL!	0	0	0	157	82	107	2018-01-17	11.62	56.5	32.3	4.65	143	268	#NULL!	1694.9	12	4461	853.9	2	2335.7	#NULL!	17	18	71.9	39.4	6.37	1.83	1.75	4.14	3.9	135.2	95	2.29	8.7	107	506	25.9	46.1	11.07
NDKD	33.7	1	1	0	1	male	53	2018-01-23	48	0	0	0	0	105	63	77	2018-01-25	5.56	52.2	36.7	4.54	132	181	#NULL!	30.9	20.8	6475	10523.1	1	3392	#NULL!	14	15	43.4	19.7	7.69	5.92	1.12	2.72	4.31	141	106.5	1.96	6.8	102	281	26	72	16.75
NDKD	39.8333	1	0	1	0	male	46	2018-01-31	1	#NULL!	1	0	0	156	120	132	2018-02-05	7.04	56.8	34.7	4.99	141	224	#NULL!	175.1	15.9	2758	2148	2	1014.7	#NULL!	18	17	67.6	39	3.96	3.305	1.2175	3.0875	4.07	141	100.9	2.29	7.92	170	436	28.8	40.8	6.14
NDKD	16.4446	1	1	1	0	male	57	2018-02-28	3	0	0	0	0	94	75	81	2018-03-01	11.7	85.4	11.2	4.06	132	271	85	12.3	8.2	#NULL!	5122.1	#NULL!	1519.28	#NULL!	32	28	53.8	23.9	6.37	4.87	1.01	3.58	4.94	131.2	95.8	2.26	5.8	60	350	19.9	106.1	8.32
NDKD	39.7	1	0	1	0	male	46	2018-04-09	2	0	0	0	0	130	73	92	2018-04-19	#NULL!	#NULL!	#NULL!	#NULL!	#NULL!	#NULL!	18	15.3	5.2	#NULL!	6946	1	1519.28	#NULL!	#NULL!	#NULL!	#NULL!	36.85	4.52	3.47	1.04	2.815	3.84	141.4	106.8	1.98	4.6	74	356.7	28.1	105.2	8.255
NDKD	16.4446	0	0	0	0	male	54	2018-07-23	#NULL!	#NULL!	0	0	0	130	75	93	2018-07-26	8	69.1	19	4.69	148	210	#NULL!	7.5	2.7	355	871.3	2	69.4	#NULL!	18	18	77.1	47	2.95	0.6	0.99	1.91	4.04	141	100.4	2.3	7.55	97	331.9	20.8	75.9	6.35
NDKD	1.33333	1	1	0	1	male	56	2019-01-17	132	#NULL!	1	0	0	140	101	114	2019-01-21	10.1	64.1	21.2	4.14	125	228	30	382.5	47.3	3035	5399.9	1	1601	4.4	32	26	67.8	37.5	4.8	2.49	1.04	3.05	4.35	136.9	99.5	2.27	6.17	144	391.2	26.2	46.4	12.21
NDKD	41.1667	0	0	1	0	female	46	2019-01-22	#NULL!	#NULL!	0	0	0	139	75	96	2019-01-24	5.63	57.4	30.4	4.47	138	364	3	23.3	4.7	287	196	2	175.4	#NULL!	14	16	74.1	48.4	4.13	2.29	1.21	2.2	4.11	142.5	104.9	2.41	3.4	46	215	26.1	114.9	6.71
NDKD	40.7667	1	1	1	0	female	52	2019-01-16	#NULL!	#NULL!	0	0	0	175	93	120	2019-01-24	3.28	68.3	22.3	4.24	122	177	25	3.4	29.3	730	263	2	368.7	#NULL!	9	19	76.1	42.5	4.96	1.43	1.39	3.04	3.87	142	103.1	2.4	6.2	82	285	26	71.1	11.04
NDKD	36.5	1	1	0	1	male	52	2019-02-12	6	#NULL!	0	0	0	134	77	96	2019-02-14	6.9	68.5	23.2	4.27	134	382	#NULL!	46.9	5.6	1342	4191.2	1	749.7	#NULL!	25	14	51.3	24.6	4.02	2.31	1.11	2.31	4.14	142.3	105.7	2.14	4.6	105	411	26.2	70	6.6
NDKD	16.4446	0	0	1	0	female	63	2019-02-25	6	0	0	0	1	169	73	105	2019-02-28	5.9	66.3	25.1	3.82	117	237	28	6.6	17.1	1123	2652	2	1941	#NULL!	13	18	50.6	26.5	7.42	2.97	1.51	4.87	4.39	139.9	105.6	2.03	5.5	49	321.3	26	99.9	8.32
NDKD	22.6333	1	0	1	0	female	64	2019-02-21	#NULL!	0	0	0	0	116	68	84	2019-02-28	7.99	55.6	34.3	4.29	124	371	#NULL!	42.8	20	2248	2233.8	2	2113.7	#NULL!	16	16	61.9	32.5	7.66	2.4425	1.35	3.185	4.15	144.4	102.9	2.18	4.16	67	364.8	27.6	83.4	8.12
NDKD	19.8	0	0	0	0	male	50	2019-03-19	6	#NULL!	1	0	0	116	88	97	2019-03-26	6.15	64.2	27.8	5.04	153	206	#NULL!	24.6	3.7	937	1070.7	2	820.3	#NULL!	13	10	66.7	40.2	2.61	2.4425	1.35	3.185	4.51	144.1	103	2.32	6.6	105	382	29.8	71	11.11
NDKD	16.4446	0	0	1	0	female	51	2019-03-25	12	#NULL!	0	0	0	136	80	99	2019-04-03	4.95	58.2	33.7	4.3	130	130	#NULL!	4.8	155	176	267.8	2	266.5	0.3	30	29	72.5	41	5.63	2.23	1.8	3.19	4.18	141.4	103.8	2.33	4.4	63	243	27.2	98.5	8.75
NDKD	35.0333	1	0	0	1	female	49	2019-04-02	36	#NULL!	0	0	0	131	87	102	2019-04-03	4.66	71.9	19.7	4.34	125	248	45	165.6	21.5	351	960	2	274.41	11.8	15	17	84.4	43.2	3.89	2.26	0.98	2.37	4.4	139.7	99.4	2.45	7	59	195.9	27.9	103.7	9.2
NDKD	19.7333	0	0	0	0	female	29	2019-04-11	36	#NULL!	0	0	0	115	93	100	2019-04-15	4.75	72.2	16.6	5.02	135	181	13	965.2	136.6	750	244.8	2	144.02	35.8	35	28	76.1	46	4.52	3.22	0.81	2.52	3.72	136.2	96.8	2.27	4	72	396.6	23.6	97.8	5.56
NDKD	25.9	0	0	1	0	male	38	2019-04-15	3	#NULL!	0	0	0	150	80	103	2019-04-17	6.61	75.7	15.4	5.16	153	156	3	11	4.6	1779	2715.5	2	1140.8	#NULL!	35	24	65.3	39.3	4.08	3.99	0.65	2.44	4.08	140.8	102.8	2.22	6.6	112	286	28	71.4	11.38
NDKD	2.4	1	0	0	0	male	56	2019-05-28	48	#NULL!	0	0	0	134	83	100	2019-06-03	8.87	69.7	17.7	5.3	134	133	18	9.3	4.9	#NULL!	798	2	735.33	#NULL!	38	27	73.3	41.8	3.67	6.53	0.53	1.36	4.54	140.9	101.3	2.27	7.63	249	367.5	23.4	24	12.48
NDKD	14.4667	0	0	1	0	male	34	2019-06-24	12	#NULL!	0	0	0	135	81	99	2019-06-26	5.08	42.2	46.9	5.17	155	259	#NULL!	261.2	5.3	391	450	2	174.3	#NULL!	45	26	73.6	45.4	4.24	2.12	0.93	2.69	4.19	139.4	102.8	2.3	4.8	61	493.4	23	123.9	7.18
NDKD	15.0333	0	0	1	0	male	44	2019-07-07	0.5	0	0	0	0	158	99	119	2019-07-09	8.21	57.7	34	5.14	149	491	19	14	4.6	1044	1898.5	2	1482.2	0.7	22	17	68.8	35.7	4.34	3.94	0.94	1.94	4.14	141.3	101.6	2.11	7.7	99	616	26.2	79.5	5.82
NDKD	16.4446	0	0	1	0	female	48	2019-07-09	24	#NULL!	0	0	0	141	85	104	2019-07-11	5.64	53.3	36.2	4.16	98	399	31	55.6	4.3	#NULL!	832	2	1055.58	#NULL!	15	17	78	42.9	6.05	3.25	1.14	3.45	3.66	139.6	100.5	2.27	4.94	76	294.9	21.2	80.2	5.01
NDKD	16.7667	1	0	1	0	male	35	2019-09-16	1	#NULL!	0	0	0	119	74	89	2019-09-18	7.01	58.9	28.7	4.58	138	165	5	206.1	9.4	359	390.6	2	127.7	#NULL!	38	57	70.5	45.4	3.9	2.15	0.8	2.55	4.24	139.1	103.2	2.37	4	70	706	25.2	116.2	5.61
NDKD	35.8	0	0	1	1	female	42	2019-09-23	60	#NULL!	0	0	0	138	85	103	2019-09-25	8.08	60	30.7	4.68	144	253	#NULL!	4.7	1.6	1933	3289.5	2	2438.1	#NULL!	13	18	66.1	39.9	4.91	8.04	1.01	2	4.17	136.7	100.9	2.32	6.3	94	337.1	21.9	64.7	9.25
NDKD	26.4333	1	0	1	1	female	41	2019-10-08	36	0	0	0	0	149	99	116	2019-10-08	17.6	85.2	11.9	3.98	120	475	#NULL!	22.6	33	6358	2091.97	#NULL!	7036.7	2.8	16	13	53.2	29.5	6.21	2.29	1.7	3.35	3.94	137.5	100	2.18	13.4	107	432	23.1	55.7	10.42
NDKD	32.9	0	0	1	0	female	31	2019-12-16	48	#NULL!	0	1	0	158	103	121	2019-12-18	8.78	60.1	29.3	4.39	130	338	7	10	4	2964	2206.4	2	1718.8	1.6	73	59	69	41.8	4.56	5.01	0.92	2.12	3.95	138.7	99.1	2.19	2.4	38	229.9	25.7	136	7.62
NDKD	33.3	0	0	1	0	female	52	2019-12-25	36	0	0	0	0	194	114	141	2019-12-26	9.87	80.9	14	5.07	145	331	18	16.8	23.4	#NULL!	2354.22	#NULL!	2885.7	0.9	12	12	56.7	29.7	8.25	4.44	1.45	5.1	3.96	144.6	106.2	2.09	6.73	61	340.7	25.1	100.4	8.7
NDKD	2.46667	1	0	1	1	male	69	2020-05-10	6	#NULL!	1	0	1	108	74	85	2020-05-14	15.85	88.7	4.2	4.13	123	115	28	16.1	3.8	1352	2481.4	2	1921.7	11.7	22	14	49	24.3	4.94	1.39	2.6	1.71	4.45	135.2	102.2	1.97	9.2	118	441	18.7	53.9	16.52
NDKD	26.6	0	0	1	0	female	30	2020-05-16	36	#NULL!	0	0	0	142	92	109	2020-05-21	7.78	76.2	17.4	4.3	112	319	#NULL!	17.3	4.8	2089	1439.6	2	671.3	#NULL!	14	13	71.4	41.3	4.8	0.83	1.49	2.91	4.11	139.4	104	2.22	4.4	53	340	24.2	122.7	4.67
NDKD	8	1	0	1	0	male	61	2020-06-05	36	0	1	0	0	137	83	101	2020-06-09	5.52	69.2	22.5	3.61	111	247	93	36.95	#NULL!	#NULL!	2938.3	#NULL!	2484.75	#NULL!	10	14	44.8	18.6	10.56	3.04	0.99	6.53	3.96	137.2	107	1.91	6.9	84	297	20.5	86	10.15
NDKD	16.4446	0	0	0	0	female	72	2020-07-17	12	#NULL!	0	0	0	135	92	106	2020-07-20	3.89	61.6	31.4	3.35	101	249	123	7.2	21.9	9809	7198	1	7071.5	0.3	9	17	62.6	20.3	7.23	6.4	1.15	3.21	3.39	144.7	103.8	1.99	5.33	82	439.3	27.4	61.8	5.69
NDKD	0.333333	1	1	0	1	male	64	2020-07-30	12	#NULL!	1	0	0	145	85	105	2020-08-04	8.39	83.7	9.3	4.87	108	142	#NULL!	125.25	#NULL!	1356	634.2	2	274.5	#NULL!	16	16	70.4	42.8	4.67	1.52	1.19	3.3	4.65	140.3	105.5	2.19	11.5	150	545	23.3	41.8	9.82
NDKD	16.6667	1	1	1	1	male	48	2020-08-03	0	#NULL!	1	0	0	128	90	103	2020-08-04	5.95	54.6	33.4	4.57	138	170	5	125.25	#NULL!	363	914.6	2	347.1	#NULL!	20	15	68.7	39.2	4.29	10.69	0.76	1.14	4.12	138.6	101.9	2.34	7.5	150	337	24	46.8	10.42
NDKD	6.86667	0	0	1	1	female	57	2020-08-09	0	#NULL!	0	0	0	102	73	83	2020-08-10	9.28	67.5	23.7	3.91	117	279	47	107.2	48.8	2512	7063	1	656.2	2.7	32	30	63.6	30.5	3.41	2.84	0.89	1.69	2.94	140.7	91.2	2.12	9.3	169	339	36.3	28.6	11.42
NDKD	16.4446	1	0	1	0	female	49	2020-08-14	1	0	0	0	0	106	79	88	2020-08-17	12.98	87.1	7.8	4.41	139	353	45	369.3	456.6	10105	1754.3	2	2938.8	1.5	37	24	61.6	36.2	13.68	6.07	1.47	8.26	4.49	130.1	89.1	2.21	6.61	84	352.5	28.1	70.5	28.26
NDKD	21.1333	1	1	1	1	male	39	2020-08-11	12	0	1	0	0	156	103	121	2020-08-20	10.23	53.3	38.7	3.91	127	282	28	157.9	#NULL!	6577	9543	1	2268.3	0.2	19	18	41.1	19.8	5.02	0.94	1.45	2.82	3.75	140.4	108	1.92	5.6	89	386	23.3	93.6	5.67
NDKD	8.46667	0	0	1	1	male	58	2020-08-17	60	#NULL!	0	0	0	164	85	111	2020-08-24	7.83	58.3	29.1	3.59	109	228	#NULL!	30	67.3	10542	5798	1	5912	#NULL!	13	23	45.5	20.8	7.01	2.57	0.82	5.13	3.87	143.8	111.7	2	9.56	132	331.7	21.4	50.9	7.69
NDKD	23.7667	1	0	1	0	female	30	2020-08-26	4	#NULL!	0	1	0	127	92	104	2020-08-27	5.72	36.5	52.6	3.63	115	261	16	125.1	19.1	190	7490.8	#NULL!	172.7	1.8	28	22	66.2	36.8	4.23	2.38	0.87	2.74	3.61	141.1	106.1	2.12	4.4	56	443	22.6	120.5	4.47
NDKD	23.9333	1	0	1	0	male	55	2020-09-21	12	0	0	0	0	152	106	121	2020-09-22	4.74	56.6	31.6	5.33	164	200	8	52.05	#NULL!	2086	4100	1	2350.9	#NULL!	25	20	56.8	29.5	6.96	4.44	1.73	4.03	3.82	140.8	104.2	2.2	3.1	69	368	25.6	101.6	9.68
NDKD	20.2667	0	0	1	0	male	56	2020-10-31	24	0	0	0	0	127	91	103	2020-11-05	6.71	60.9	30.1	4.7	138	410	100	14.1	7.9	5396	10522.2	1	3707.7	18.6	13	11	56.2	22.5	4.29	1.99	0.8	2.92	3.7	141.7	107.6	2.14	5.03	72	355.8	24.7	99.1	6.85
NDKD	16.4446	0	0	1	0	male	52	2020-11-10	60	#NULL!	1	0	0	165	99	121	2020-11-11	6.86	60	15	2.79	83	188	66	47.3	#NULL!	#NULL!	6800.23	#NULL!	2672.6	#NULL!	13	21	81.8	41.3	3.66	3.34	0.83	1.49	5.44	137.4	100.2	2.03	35.7	618	435	12.2	8.2	4.16
NDKD	16.4446	0	0	0	0	female	55	2020-11-11	36	0	0	0	0	112	82	92	2020-11-12	11.73	66.6	25.3	5.03	145	210	#NULL!	39	13.8	5143	4628.7	1	7466.5	#NULL!	18	21	57.7	27.5	3.78	5.3025	1.0125	2.4125	4.38	138	104.5	2.25	4.03	64	263.1	24.1	93.9	8.48
NDKD	16.4446	0	0	0	1	male	42	2020-11-27	60	#NULL!	0	0	0	145	110	121.667	2020-12-02	7.95	64.2	28.3	5.86	181	297	42	16.375	#NULL!	6625	7950	1	2976.5	#NULL!	23	26	49.9	18	15.96	14.62	1.49	3.7	4.19	138.1	106.3	2.21	6.5	101	334	22.9	78.7	8.23
NDKD	14.2667	0	0	1	0	male	45	2021-01-25	36	#NULL!	0	0	0	121	79	93	2021-01-27	6.48	53.4	36.4	4.59	138	171	#NULL!	11	59.3	543	760.2	2	242.77	#NULL!	24	29	73	45.2	2.71	1.26	0.93	1.54	3.58	139.3	103	2.26	5.1	100	411	25	78	6.58
NDKD	16.4446	0	0	1	1	male	43	2021-04-01	0.5	#NULL!	0	0	0	130	94	106	2021-04-06	8.71	51.4	42.4	5.07	155	269	7	1.4	3.8	349	680.5	2	276.1	1.2	22	18	65.8	44.3	3.61	4.75	0.74	1.68	4.16	139	101.6	2.26	6.2	139	298	25.4	53.1	3.85
NDKD	5.23333	0	0	1	1	female	72	2021-03-31	180	#NULL!	0	0	0	153	68	96.3333	2021-04-08	4.79	74.1	12.5	3.06	65	225	#NULL!	30.15	#NULL!	137	198.6	2	83.2	#NULL!	139	162	76.5	34.4	2.11	1.66	0.12	0.93	4.66	132	101.8	2.21	10	156	381	20.8	28.4	9.51
NDKD	16.2667	0	0	1	0	male	61	2021-04-09	120	#NULL!	0	0	1	165	95	118.333	2021-04-12	8.71	67.2	20.4	4.16	134	247	#NULL!	3.2	4.9	1005	1929.6	2	633.29	#NULL!	29	24	78.8	45.1	3.06	2.7825	0.71	2.7975	4.5	143.6	103.7	2.39	7.4	106	269.8	24.4	64.9	8.4075
NDKD	10.5	0	0	1	0	female	49	2021-05-06	36	#NULL!	0	1	0	118	74	88.6667	2021-05-06	6.37	66.2	25.3	3.78	114	271	10	28.4	#NULL!	142	142	2	58.7	#NULL!	19	17	77.6	48.1	6.03	2.61	1.12	4.39	3.99	139.8	99.5	2.5	4.8	57	401	30.6	104.9	11.36
NDKD	0.966667	1	0	1	0	female	61	2021-06-03	3	#NULL!	0	0	0	117	84	95	2021-06-07	6.5	66.1	26.2	3.86	119	285	51	105	125.5	263	315.6	2	115.1	0.6	9	18	71.9	41.7	6.24	2.11	0.86	4.19	3.24	142.7	106	2.31	4.5	92	258	27.6	58.1	8.91
NDKD	8.46667	0	0	0	#NULL!	male	58	2021-06-22	84	#NULL!	0	0	0	170	101	124	2021-06-28	6.07	61.2	28.8	4.96	161	208	38	4	44	1490	4321	1	5493.1	3.3	37	26	48.8	26.5	10.74	20.91	1.01	1.57	4	133.6	99.5	2.01	7.78	68	283	26.9	100.1	9.23
NDKD	13.7667	0	0	0	0	male	51	2021-06-25	0	#NULL!	0	0	0	129	91	103.667	2021-06-28	6.25	52.7	38.2	5.21	155	271	21	25.1	7.5	3766	8285.2	1	2722.6	1.7	10	12	50.2	24.5	7.82	2.78	1.18	5.39	4.25	137.4	105	2.04	5.8	75	353	24.4	101	19.26
NDKD	16.4446	0	0	0	#NULL!	male	49	2021-06-29	0	#NULL!	0	0	0	112	81	91.3333	2021-07-01	5.85	52.4	34.9	4.38	136	391	85	8.725	#NULL!	332	481.4	2	277	#NULL!	12	14	58.3	28.2	4.52	1.91	0.66	3.25	3.93	140.2	107.1	2.12	3	54	346	21.2	117.2	6.94
NDKD	3.13333	0	0	0	0	female	71	2021-07-10	84	#NULL!	0	0	0	125	77	93	2021-07-12	5.53	51.7	34	4.3	128	259	18	8.725	#NULL!	446	588.7	2	713.5	2.3	19	20	68.4	42	5.72	2.7	1	3.17	4.19	142.1	104.3	2.49	6.42	65	421	25.7	82.4	4.25
NDKD	11.4667	#NULL!	#NULL!	#NULL!	#NULL!	male	28	2021-07-16	0	#NULL!	0	0	0	132	101	111.333	2021-07-19	6.17	49	41.2	5.51	163	335	5	2.5	3.9	209	259.2	2	184.48	0.9	73	36	87.1	52.2	10.43	18.99	0.94	1.73	3.77	134.9	93.8	2.56	3.6	70	430	32.3	122.1	9.15
NDKD	13.4667	0	0	0	1	male	38	2021-07-21	8	#NULL!	0	0	0	119	83	95	2021-07-26	10.61	60.8	27.7	4.85	147	356	#NULL!	3.3	8.1	642	995.1	2	373.1	#NULL!	22	15	73.1	44.9	6.3	8.01	0.85	2.54	4.09	135.9	100.1	2.45	8.01	121	491.7	18.6	65	11.79
NDKD	0.866667	0	0	1	0	male	30	2021-07-25	24	#NULL!	0	0	0	171	118	135.667	2021-07-26	6.05	62.8	24.8	5.53	165	197	#NULL!	58.45	#NULL!	484	1452	2	1306.2	#NULL!	33	21	61.8	39.5	4.04	2.04	1.04	2.68	3.62	139.8	104.4	2.28	4.5	115	465	24.1	73.2	6.12
NDKD	11.9333	0	0	0	0	female	27	2021-07-27	18	#NULL!	0	0	0	114	85	94.6667	2021-07-29	9.86	59.4	32.4	4.59	142	337	#NULL!	58.45	#NULL!	602	993.3	2	3220.3	0.7	11	16	73.3	39	4.78	0.89	1.35	3.06	4.1	138.4	106	2.41	10.92	73	393.9	18	97.5	5.77
NDKD	16.4446	1	0	1	1	female	69	2021-08-05	120	#NULL!	0	0	0	161	104	123	2021-08-09	7.54	69.1	22.4	3.16	95	326	98	159.5	26.6	1208	3020	2	3846.5	53	10	14	63.7	32.3	4.21	2.27	0.84	2.46	3.71	139.3	100.3	2.2	5.1	110	229	22.9	44.2	10.49
NDKD	12.4333	1	1	0	1	female	58	2021-08-23	36	#NULL!	0	0	0	142	81	101.333	2021-08-30	5.57	67.2	19.7	4	116	139	85	86.2	#NULL!	9065	12237.8	1	7355.4	1	36	39	51.1	22.9	7.91	1.96	1.78	5.36	3.61	144.5	109	2.02	7.2	59	170.3	22.5	97.3	22.76
NDKD	11.4333	0	0	1	0	female	52	2021-08-31	60	#NULL!	0	0	0	125	91	102.333	2021-09-01	6.7	63	28.7	4.12	113	148	23	86.2	#NULL!	#NULL!	8142.4	#NULL!	1390.7	1.2	10	16	64.6	36.9	3.39	2.11	0.94	1.38	3.85	141.2	103.6	2.33	7.64	121	381.3	25.3	44.4	13.88
NDKD	8.26667	#NULL!	#NULL!	#NULL!	#NULL!	male	50	2021-09-20	0	#NULL!	0	0	0	188	108	134.667	2021-09-27	7.29	72.1	18.4	5.06	148	263	60	68.5	85.9	15300	13005	1	7310.78	3.7	14	17	48	23	8.13	4.54	0.99	4.51	3.89	135.4	100.1	1.95	4.1	69	335	24	105.2	16.11
NDKD	1.06667	0	0	1	0	male	55	2021-10-26	0	#NULL!	0	0	0	175	101	125.667	2021-11-01	8.47	59.7	28.3	5.15	146	282	#NULL!	113.5	27.9	3589	4306.8	1	6748	4.9	17	19	56.8	21.7	7.32	2.82	0.97	4.69	3.81	140.2	103.8	2.04	5.4	101	402.8	26.6	71.8	11.0675
NDKD	0.466667	0	0	1	0	female	42	2021-10-30	120	#NULL!	0	0	0	104	75	84.6667	2021-11-01	6.3	77.1	16.7	3.9	112	164	#NULL!	32.4	3.2	62	149.4	2	5512.04	#NULL!	30	30	82.6	44.5	5.26	1	1.95	2.7	4.56	136.9	99.8	2.6	11.1	124	231	22.1	46.3	7.64
NDKD	16.4446	0	0	1	0	male	68	2021-10-28	180	#NULL!	0	0	0	178	86	116.667	2021-11-01	5.01	61.3	28.9	3.92	126	156	11	199.4	6.7	2250	4050	1	1282.48	0.4	44	47	60.5	34.6	5.65	0.55	1.97	3.18	4.2	141.5	107	2.18	4.7	81	332	24.8	85.6	6.64
NDKD	16.4446	0	0	1	0	male	41	2021-10-30	36	#NULL!	0	0	1	145	94	111	2021-11-03	7.96	65.3	22.7	3.81	110	238	#NULL!	41.3	7.6	1775	4615	1	3789.47	#NULL!	8	11	72.5	38.9	3.55	1.56	0.65	2.11	3.97	138.2	104.2	2.18	9.04	390	429.7	19.3	15.5	8.95
NDKD	3.3	#NULL!	#NULL!	#NULL!	#NULL!	male	34	2021-11-12	0	#NULL!	0	0	0	120	87	98	2021-11-15	8.58	61.2	27	5.09	153	370	32	89	63.4	12918	3875.4	1	6706.9	0.6	12	14	47.4	20.4	9.05	11.19	1.15	3.01	3.87	137.7	102.8	2.05	6.9	138	307.9	21.6	57.1	6.65
NDKD	16.4446	0	0	1	0	female	34	2021-12-13	0.23	#NULL!	0	0	0	156	92	113.333	2021-12-14	11.37	68.8	22.9	4.9	127	429	40	50.15	#NULL!	282	676.8	2	420.5	11.3	95	74	83.5	50.9	5.92	3.87	1.07	3.92	4.26	139	99.5	2.47	5	65	526	23.7	106.9	9.51
NDKD	7.53333	0	0	1	1	female	58	2021-12-19	12	#NULL!	0	0	0	137	78	97.6667	2021-12-22	4.94	57.3	35.4	3.79	114	178	7	50.15	#NULL!	52	52	2	4	0.3	40	40	78.8	44.4	2.98	1.24	0.93	1.43	4.07	140.7	102.9	2.32	7.2	89	262	25.3	61.7	7.2725
NDKD	16.4446	0	0	1	0	male	48	2022-03-01	2	#NULL!	0	1	0	124	83	96.6667	2022-03-02	9.05	60.4	28.4	4.66	153	228	#NULL!	50.15	#NULL!	997	1645.1	2	589.2	#NULL!	28	16	67.4	39.6	3.68	1.86	0.77	2.47	3.84	141	106.9	2.38	7.9	76	346	23.4	102.6	6.82
NDKD	2.23333	0	0	1	0	male	54	2022-03-27	6	#NULL!	0	0	0	155	106	122.333	2022-03-28	8.78	68.2	23.5	5.27	161	277	#NULL!	17.2	13.7	4721	11094.3	1	7868.6	#NULL!	18	22	47.4	20	7.98	3.18	1.22	5.37	4.51	139.5	106	2.08	7.1	85	410	27.1	89.1	6.11
NDKD	0.433333	0	1	1	0	female	46	2022-04-23	84	#NULL!	0	0	0	137	99	111.667	2022-04-25	6.81	68.6	20.4	3.58	101	192	14	60.575	#NULL!	124	223.2	2	48.3	1.8	24	21	67.6	41.9	4.99	3.08	0.89	2.89	4.19	142.1	106.9	2.31	5.5	78	369	25	78.8	6.81
NDKD	2.43333	0	0	1	0	female	55	2022-05-07	1	#NULL!	0	0	0	115	88	97	2022-05-09	8.89	56.4	30.3	4.3	135	242	24	53.1	121.3	409	482.6	2	680.8	4.2	29	25	79.3	42.2	4.5	1.19	1.48	2.81	4.36	139.9	102.2	2.46	7.4	94	424	24.2	59	5.92
NDKD	2.1	1	0	1	0	male	56	2022-04-25	#NULL!	#NULL!	0	0	0	130	85	100	2022-05-09	9.79	67.8	23.9	3.49	107	155	#NULL!	39.2	#NULL!	5232	8894.4	1	4179.4	#NULL!	18	21	39.6	15.3	6.72	5.56	1.6	3.36	4.08	141.2	109.6	1.9	10.4	118	379	26.1	59.1	10.48
NDKD	3.1	1	0	0	0	female	44	2022-05-11	3	#NULL!	0	0	0	133	88	103	2022-05-16	11.41	81.7	11.4	44.4	132	356	86	39.2	#NULL!	2302	6447.9	1	6756.4	10.3	16	14	42.8	17.9	9.11	7.69	1.27	5.17	3.96	137.3	103.8	1.9	4.34	39	250.5	30.5	123.1	20.77
NDKD	16.4446	0	0	1	0	male	66	2022-05-14	24	#NULL!	0	0	1	135	68	90.3333	2022-05-17	4.22	72.8	17.8	4.19	138	116	#NULL!	39.2	#NULL!	653	1273.3	2	1295.8	#NULL!	19	28	70.2	47.8	4.39	1.64	0.93	2.74	4.2	139.3	103.9	2.27	14.8	208	347	20.6	27.8	5.97
NDKD	0.233333	0	0	1	0	male	42	2022-05-30	6	#NULL!	1	0	0	128	98	108	2022-05-31	6.57	64.8	25.7	5.51	164	309	#NULL!	39.2	#NULL!	64	150.4	2	19	#NULL!	18	20	73.4	47.2	3.63	5.81	0.68	1.46	4.07	137.8	101.8	2.31	6.8	164	471	21.8	43.8	10.4125
NDKD	1	1	1	1	1	female	71	2022-06-06	180	#NULL!	0	0	0	105	63	77	2022-06-08	8.31	67.8	24.2	5.05	149	300	#NULL!	83	20.4	1447	2676.9	2	3992.8	#NULL!	14	19	60	32.4	4.24	3.51	1.04	1.79	4.01	143	107.2	2.42	7.83	76	398	24.3	68.2	9.63
NDKD	1.13333	0	0	1	0	male	59	2022-06-07	36	#NULL!	0	0	0	157	104	121.667	2022-06-08	8.56	56.1	30.5	4.51	140	250	#NULL!	3.5	12.9	989	1582.4	2	1462.3	#NULL!	15	19	68.9	41.2	5.04	6.93	0.82	1.77	3.83	140	105.2	2.41	7.37	143	415.9	19.3	45.9	5.28
NDKD	2.9	0	0	1	1	female	70	2022-06-06	360	#NULL!	0	0	0	117	64	81.6667	2022-06-08	8.87	74	12.6	2.87	84	390	113	1.3	12.4	304	790.4	2	81.3	#NULL!	7	14	88.1	40.5	3.65	1.79	0.84	2.06	5.36	135.6	100.9	2.42	15.5	205	319	17.5	20.7	12.02
NDKD	2.4	0	0	1	1	female	59	2022-06-10	0.33	#NULL!	0	0	0	135	71	92.3333	2022-06-13	7.75	73.4	15.4	3.38	98	101	76	1736.6	35.2	1563	2188.2	2	1284.8	#NULL!	41	50	68.2	31.2	2.87	2.05	0.96	1.11	4.63	138.7	104.9	2.17	7.4	123	330	23.1	41.5	9.89
NDKD	1.16667	1	1	1	1	female	71	2022-06-09	72	#NULL!	0	0	0	120	65	83.3333	2022-06-14	5.75	60.6	27.7	3.77	117	210	89	490.225	#NULL!	25172	10068.8	1	5624.7	1	12	21	55.8	26.8	5.56	1.41	2.23	2.51	3.51	141.7	101.6	2.02	6.2	59	536	28.6	88.8	13.49
NDKD	1.76667	0	0	1	1	female	64	2022-06-17	240	#NULL!	0	0	1	130	80	96.6667	2022-06-21	6.36	79.5	15.4	4.03	128	186	7	147	20.4	134	221.1	2	7.3	0.4	25	22	77.3	47.4	4.07	2.46	1.16	2.3	3.9	138.6	102.4	2.37	7.3	68	281	22.7	82	14.36
NDKD	1.36667	0	0	1	0	male	55	2022-07-08	12	#NULL!	0	1	1	147	97	113.667	2022-07-11	6.42	65.8	25.7	4.93	157	335	#NULL!	76	4.8	342	468.5	2	115.7	#NULL!	30	26	66.8	42.6	3.27	4.54	0.67	1.11	3.74	141.4	101.7	2.47	7.13	123	333.3	22.5	56.6	7.28
NDKD	0.866667	0	0	1	0	female	59	2022-07-12	2	#NULL!	0	0	1	165	92	116.333	2022-07-18	6.5	71.7	22.8	3.96	114	225	12	21.8	131.3	#NULL!	933.125	#NULL!	839.025	#NULL!	10	14	71.2	40.6	1.93	1.09	0.93	0.63	4.14	142.8	106.3	2.28	8.9	151	447	21.7	32.4	8.42
NDKD	16.4446	0	0	1	1	male	59	2022-07-18	60	#NULL!	0	0	0	156	101	119.333	2022-07-19	13.19	82.8	7.9	3.86	120	152	104	126.7	13.2	1811	2716.5	2	3140.2	73.8	11	15	51.9	18.4	5.84	2.68	1.06	4.21	4.24	140	107.5	2.01	6.5	117	271	26.9	58.4	5.99
NDKD	1.4	0	0	0	0	female	54	2022-07-11	2	#NULL!	0	0	0	127	82	97	2022-07-13	6.96	59.6	31.6	4.25	127	351	#NULL!	66.6	#NULL!	204	326.4	2	92.9	#NULL!	25	24	73.5	44.8	4.9	2.93	1.04	2.71	3.82	141.2	104.2	2.32	6.3	48	329	23.8	107.1	5.82
NDKD	8.36667	0	0	0	0	male	63	2021-11-08	0.23	#NULL!	0	0	0	133	94	107	2021-11-17	5.23	50.7	39.4	5.92	170	138	1	114.4	3.3	512	819.2	2	447.6	1.8	46	29	62.5	38.8	3.15	3.03	0.78	1.19	3.74	136.7	98.9	2.31	4.6	87	414	23.3	81.3	14.91
NDKD	6.73333	0	0	0	0	male	60	2020-11-02	24	1	1	0	1	187	113	137.667	2020-11-04	6.4	67.8	23.9	3.39	108	231	#NULL!	320.525	#NULL!	612	1652.4	2	1582.6	#NULL!	8	9	55.4	28.2	5.85	1.52	1.14	4.19	4.24	141.7	107.9	2.19	8.6	83	322	27.7	87.9	12.97
DN+NDKD	16.4446	0	0	1	0	male	33	2016-04-06	12	0	1	0	0	154	104	121	2016-04-11	7.47	46.7	42.3	5.56	168	178	#NULL!	3.5	4.5	#NULL!	1654.8	2	1203.4	#NULL!	39	35	69.5	38.6	5.11	7.77	0.67	1.69	3.77	138.7	99.2	2.2	4.66	103	254	23	72.1	10.92
DN+NDKD	16.4446	1	0	0	1	male	53	2016-05-16	24	0	1	0	0	122	82	95	2016-05-19	8.86	66.1	28.7	4.41	125	273	72	1037.5	52.1	#NULL!	11412.9	1	1203.4	#NULL!	16	17	71.5	32.6	5.46	2.32	0.84	3.51	5.38	138.5	100.4	2.21	23.5	372	542.1	22.1	14.9	6.61
DN+NDKD	52	0	0	1	0	male	57	2016-07-25	12	0	1	0	0	133	72	92	2016-07-27	6.46	60.1	27.1	4.36	143	185	#NULL!	5.7	3.8	#NULL!	3825.85	#NULL!	1203.4	#NULL!	13	14	69.1	41.7	4.03	6.46	0.825	2.115	4.42	142.2	107.8	2.23	9.4	111	518.2	19.8	59.2	8.66
DN+NDKD	32	1	0	1	1	male	55	2016-08-09	24	#NULL!	0	0	0	95	67	76	2016-08-11	6.74	47.2	40.8	3.75	116	188	#NULL!	249.1	5.4	#NULL!	840	2	1203.4	#NULL!	27	22	65.5	37.4	2.66	2.92	0.62	1.18	4.2	140.3	102.6	2.1	9.6	165	510	23.5	37.8	7.71
DN+NDKD	47	0	0	1	1	male	51	2017-02-20	48	#NULL!	1	0	0	137	89	105	2017-02-23	5.14	46.1	43	4.48	134	312	#NULL!	5.2	6.9	605	1395.7	2	489.9	#NULL!	20	20	72.6	46.7	6.4	3.12	0.81	2.095	3.99	141.8	99.6	2.53	8.6	86	332	24	89.7	8.38
DN+NDKD	43	0	0	0	0	male	59	2017-05-10	72	#NULL!	0	0	0	128	63	85	2017-05-18	7.46	68.1	18.6	3.55	111	265	#NULL!	54.6	5.3	2220	5310	1	2293.5	34	16	15	60.9	35	3.97	2.54	1.17	2.08	4.53	139.5	103.6	2.36	14.6	244	468	21.9	24	7.19
DN+NDKD	16.4446	0	0	1	0	male	56	2017-10-09	36	#NULL!	0	0	0	162	82	109	2017-10-12	8.31	74.4	19.7	4.34	128	219	#NULL!	3.6	5.7	378	363	2	267.8	#NULL!	14	15	71.4	45.3	3.1	3.22	0.61	1.61	2.7	143.6	98	2.49	7.98	100	454.1	26.6	72.2	7.34
DN+NDKD	33	0	0	1	1	male	46	2018-02-01	48	1	0	0	0	137	84	102	2018-02-05	8.01	61.3	31	4.69	142	192	4	1	1.8	690	798	2	285.6	#NULL!	17	18	75.3	48.6	3.72	1	1.06	2.24	4.01	144.8	103.7	2.34	6.7	105	338	25.9	73	2.78
DN+NDKD	11	0	0	0	1	female	48	2018-03-07	60	#NULL!	0	0	0	177	90	119	2018-03-08	6.21	62.8	29.3	3.7	104	368	#NULL!	24.3	10	7144	3375.35	#NULL!	8752.9	#NULL!	13	21	61	28.7	5.44	3.96	1.51	3.04	3.64	138.7	104.8	2.26	7.7	98	405	21	59	6.9875
DN+NDKD	16.4446	0	0	1	1	male	46	2018-03-09	24	0	1	0	0	137	61	86	2018-03-13	10.53	64.4	29.3	4.54	142	159	#NULL!	97.2	26.9	#NULL!	11014.4	1	5252.45	#NULL!	15	14	55.9	23.3	7.73	5.59	1.33	3.32	4.93	140.1	105.1	2.13	5.4	102	490	23.5	75.6	6.9875
DN+NDKD	31	0	0	1	0	male	34	2018-05-13	12	#NULL!	0	1	0	137	92	107	2018-05-17	5.59	54.3	32.6	5.35	150	194	#NULL!	4.7	10	#NULL!	1326	2	5252.45	#NULL!	21	21	70.9	44.8	4.99	1.48	0.9	3.49	4.14	144.3	107.3	2.23	9.2	72	434	23.8	115.7	5.46
DN+NDKD	28	1	0	0	1	female	54	2018-06-14	84	1	0	0	0	125	78	94	2018-06-21	4.15	53.8	34.9	4.17	123	248	75	12.1	25.5	19062	4572.8	1	8456.2	#NULL!	16	21	48.3	17.6	9.4	1.85	1.27	6.18	4	137.1	104.1	1.89	4.03	56	319.9	23.6	101.8	12.37
DN+NDKD	15	0	0	1	1	male	33	2018-07-27	24	0	0	0	0	133	89	104	2018-07-30	4.88	58.5	29.1	3.95	117	170	51	42	6	4508	7672.5	1	3515.1	#NULL!	16	14	64.7	33.6	4.69	4.38	0.86	1.81	3.73	143.7	106.2	2.12	7.87	142	337.4	28.8	55.5	8.28
DN+NDKD	27	0	0	0	1	male	53	2018-08-21	156	0	1	0	0	134	96	109	2018-08-23	5.07	70	20.7	4.47	133	145	7	30.9	395.6	778	1432.5	2	699.2	#NULL!	16	14	70	42.7	7.5	19.17	0.68	0.95	4.22	137.2	98.9	2.35	7.1	185	376	22	35	13.67
DN+NDKD	9	0	0	1	1	male	54	2018-11-17	24	#NULL!	1	0	0	185	111	136	2018-11-22	4.55	69.5	21.5	4.03	119	119	16	72	14	3444	2743.3	2	1219.4	2.6	27	34	57.1	30	4.1	2.68	0.8	1.47	4.18	141.3	105.9	2.04	7.91	134	466.5	25.7	51.4	10.04
DN+NDKD	16.4446	0	0	0	1	female	60	2018-11-27	90	#NULL!	0	0	0	157	90	112	2018-12-04	5.47	63.4	26.9	3.08	87	176	84	71.5	34.8	3606	12646.2	1	7154.8	#NULL!	9	20	61.5	30.5	4.15	2.51	0.79	2.35	3.92	142.4	103.6	2	4.3	72	259	27.4	78.7	9.3575
DN+NDKD	25	0	0	1	1	male	51	2018-11-28	24	1	1	0	0	146	96	113	2018-12-06	5.02	49.3	36.1	3.63	110	279	#NULL!	40.4	9	1289	7374.65	#NULL!	1090.7	#NULL!	29	18	65.1	41.3	2.86	2.625	0.93	2.29	4.53	140.1	101.9	2.26	6.21	94	347	27.3	80.5	9.3575
DN+NDKD	28	1	0	1	1	male	41	2019-01-21	60	#NULL!	0	0	0	164	116	132	2019-01-24	3.89	58.9	32.4	4.3	126	232	7	0.7	2.1	958	1933.1	2	625.5	1.2	22	22	70.5	43.5	3.76	2.39	0.93	2.29	3.97	142.5	102.1	#NULL!	7.97	133	390.4	25.5	56.8	8.38
DN+NDKD	21	1	0	1	1	male	41	2019-03-11	84	0	1	1	0	130	87	101	2019-03-14	9.24	60.4	29.9	4.98	151	256	23	7.2	2.2	4647	12176	1	2412.2	2.5	18	19	55.5	27.8	6.37	2.92	1.25	3.43	3.98	142.3	105	2.03	6.1	83	551	23.4	100.4	5.34
DN+NDKD	15	0	0	1	0	male	45	2019-03-27	60	0	0	0	0	154	98	117	2019-03-28	5.29	60.5	31.4	4.27	126	217	9	0.7	1	283	4321.52	#NULL!	233.9	#NULL!	26	21	74.8	45.1	3.32	2.49	0.88	1.91	3.86	142	100.6	2.29	6.25	113	367	26.2	67.3	7.94
DN+NDKD	21	0	1	1	0	male	47	2019-04-02	12	#NULL!	0	0	0	158	87	111	2019-04-03	5.76	68.3	22.9	5.32	157	178	8	2.6	3	3001	4321.52	#NULL!	991.8	#NULL!	64	36	71.2	41.5	5.11	2.68	0.96	3.48	4.75	138.2	100.4	2.14	7.1	120	480.1	24.5	61.7	17.69
DN+NDKD	16.4446	0	0	1	0	male	46	2019-04-02	1	0	0	0	0	183	123	143	2019-04-03	7.99	67.5	25.2	4.86	135	194	10	9.1	10	#NULL!	4321.52	#NULL!	1960.35	0.9	14	15	69.6	40.7	4.36	2.98	1.09	2.5	4.21	139.3	101.7	2.22	7.2	142	340	25.8	50.7	11.9
DN+NDKD	16.4446	0	0	0	1	female	52	2019-05-31	60	#NULL!	0	0	0	123	76	92	2019-06-03	5.21	81	13.8	2.99	88	#NULL!	40	5.2	5.7	1958	1395	2	1587.7	#NULL!	22	22	71.3	38.7	5.28	4.67	0.97	2.71	5.48	133.6	98.9	2.15	14.1	154	457	23	33.2	17.16
DN+NDKD	16	0	0	1	1	female	54	2019-06-10	120	0	0	0	1	126	71	89	2019-06-20	6.25	53.9	36.2	3.99	118	284	#NULL!	699.2	32	#NULL!	1782	2	1904.53	#NULL!	12	15	50.3	21.1	5.39	2.53	1.89	2.72	3.65	141.2	104.6	1.99	9.25	68	316.9	26.8	87.9	6
DN+NDKD	18	0	0	1	1	male	41	2019-06-26	120	0	0	0	0	111	75	87	2019-06-27	7.14	53.3	38.9	4.45	132	205	11	9926.1	43.6	#NULL!	2663.38	#NULL!	1904.53	#NULL!	37	26	75.3	45.2	3.25	1.26	0.88	2.03	4.41	140.9	105	2.34	6.4	122	415	22.3	63	4.36
DN+NDKD	16	0	0	0	0	male	54	2019-07-30	72	0	1	0	0	126	94	105	2019-08-01	9.52	71.2	19.7	5.02	147	113	10	2.2	1.9	#NULL!	836.5	2	1904.53	1.8	14	17	70.4	42.9	4.55	1.79	0.82	3.11	5.24	139.2	106	2.33	11.81	163	504	20.2	40.5	5.47
DN+NDKD	10	0	0	0	1	male	55	2019-08-05	120	#NULL!	0	0	0	174	106	129	2019-08-06	3.88	57	33.5	5.59	184	156	5	189	6.1	2341	6640	1	5028	#NULL!	16	18	58.4	30.9	3.87	4.86	0.72	2.03	3.02	139.1	100.2	2.16	6.5	138	355	25	49.2	11.72
DN+NDKD	14	0	0	1	0	male	56	2019-08-22	0	#NULL!	0	0	0	149	109	122	2019-08-26	5.58	50.2	35.1	5.42	162	213	2	24.3	3.2	179	129.6	2	10.6	3	36	26	73.9	46.4	4.95	5.75	0.93	2.92	#NULL!	#NULL!	#NULL!	#NULL!	5.6	111	521	27.8	63.6	5.6
DN+NDKD	2	1	1	0	1	female	65	2019-10-16	240	#NULL!	0	0	0	155	81	106	2019-10-17	10.04	80.5	10.5	2.12	65	241	#NULL!	180	935.3	1321	1912.85	#NULL!	3345.7	0.9	8	17	67.6	35.1	7.59	2.52	1.57	4.93	7.66	132.1	101.5	2.14	31.91	587	297.3	14	6	7.63
DN+NDKD	11	0	0	1	0	male	55	2019-11-06	120	#NULL!	0	0	0	147	75	99	2019-11-11	6.02	66.3	20.1	4.85	142	194	#NULL!	34.8	2.6	1541	1912.85	#NULL!	1248.2	0.9	15	23	77.2	40.4	6.29	0.99	1.75	4.23	4.6	137.3	99.1	2.43	8.4	105	355	25.8	68.5	11.86
DN+NDKD	16.4446	0	0	1	0	male	39	2019-11-12	24	0	1	1	0	101	70	80	2019-11-14	9.27	41.9	38.6	4.43	129	370	#NULL!	2	20.3	148	120.4	2	10.4	#NULL!	26	23	81.8	49.2	4.8	7.58	1.22	1.82	4.8	140.6	96.2	2.41	9.1	162	431	23.1	45.4	5.93
DN+NDKD	9	0	0	1	1	male	51	2019-12-02	24	#NULL!	0	0	0	130	94	106	2019-12-04	8.26	58.4	30.8	4.99	158	241	#NULL!	4.4	1.6	504	761.4	2	461	#NULL!	24	17	68.8	44	4.28	2.31	0.8	2.99	3.94	141.2	104	2.32	4.3	75	422	23.5	101	8.23
DN+NDKD	11	1	0	1	1	male	49	2020-05-31	60	#NULL!	0	0	0	111	74	86	2020-06-01	5.5	73	18.9	4.11	124	215	#NULL!	519.6	4.5	1323	1516.9	#NULL!	707.4	#NULL!	16	15	76.3	42.3	4.66	3.22	0.85	3.09	3.71	142.4	105.2	2.37	8	157	534	20.6	43.9	13.4
DN+NDKD	4	0	0	1	1	male	52	2020-09-23	180	1	1	0	1	175	97	123	2020-09-28	9.47	70.5	22	4.81	147	257	8	10	150	#NULL!	1221	2	870.425	5.9	13	15	71.2	40.5	4.68	1.77	1.11	3.25	3.76	139.5	100.6	2.22	6.7	122	477.8	25	58.4	10.51
DN+NDKD	13.6667	0	0	1	1	male	62	2020-11-16	84	#NULL!	1	0	0	147	94	111.667	2020-11-18	7.13	62.3	25.5	3.96	118	300	18	175.075	#NULL!	1416	3964.8	1	1946.2	#NULL!	9	9	65.1	35	3.73	2.34	0.83	2.08	4.28	141	105.3	2.11	10	292	445	24.1	18.9	8.58
DN+NDKD	1.4	#NULL!	#NULL!	#NULL!	#NULL!	female	43	2020-11-12	1	1	0	0	0	189	110	136.333	2020-11-25	10.39	75	19.2	4.42	141	286	4	163	24.3	647	1925.8	#NULL!	367.1	1	13	17	71.5	42.7	4.83	2.74	0.94	0.81	3.65	136.6	99	2.3	5.1	58	316.6	24.1	108.8	14.42
DN+NDKD	11.8333	0	0	0	0	male	56	2021-01-25	12	#NULL!	0	0	0	126	91	102.667	2021-01-27	9.55	73.9	14.1	2.7	90	88	19	7.7	27.6	116	174	2	82.5	12.2	13	35	60.7	28.9	3.07	1.28	0.54	2.03	3.17	140.6	103.5	2.03	4	203	214	25.6	30.7	5.23
DN+NDKD	0.466667	0	0	1	0	male	60	2021-03-19	1	#NULL!	1	0	0	112	71	84.6667	2021-03-23	8.36	79.8	6.67	4.34	137	217	13	13.1	20.1	2757	2343.4	2	1966.3	0.3	13	16	58.9	34.6	6.33	3.1	0.94	4.07	3.62	141.4	105.1	2.19	8.6	110	450	25.1	62.5	8.71
DN+NDKD	16.3	0	0	1	0	male	54	2021-04-10	#NULL!	#NULL!	0	0	0	167	78	107.667	2021-04-12	4.59	58.2	27.7	3.07	92	306	119	44	8.2	3542	9740.5	1	4762.7	11.1	8	19	81.2	35.5	4.89	0.93	1.08	3.41	4.82	138.4	104.7	2.14	14.9	263	217	27.3	22.7	6.06
DN+NDKD	5.43333	0	0	1	0	male	30	2021-04-11	72	#NULL!	0	0	1	155	94	114.333	2021-04-12	4.95	71.5	13.1	2.97	80	279	88	23.875	#NULL!	2810	6744	1	5385.4	18.2	8	13	57.5	28	3.93	1.05	0.9	2.85	5	134.9	104	2.02	17	322	431.3	15.5	21.1	6.37
DN+NDKD	15.1667	0	0	1	0	male	42	2021-04-24	96	#NULL!	0	0	0	143	98	113	2021-04-26	4.81	63.8	21.8	2.57	85	157	40	2.4	2.9	1644	2679.7	2	1480.7	1.5	13	13	73.9	42.5	2.39	1.08	0.71	1.51	5.82	136.7	103.6	2.33	14	254	392.9	23	25.8	5.72
DN+NDKD	6.66667	0	0	0	0	female	50	2021-05-06	120	#NULL!	0	0	0	106	72	83.3333	2021-05-10	7.02	49.6	36.3	4.67	139	381	27	36	9.5	2226	3895.5	1	3627.8	0.3	12	17	51.9	26	6.57	1.11	1.53	4.52	4.14	138.6	103.6	2.19	5	57	306	25.3	104.1	5.06
DN+NDKD	15.3667	0	0	1	1	male	57	2021-05-18	156	#NULL!	0	0	0	125	61	82.3333	2021-05-24	6.61	63.4	26.9	5.12	145	340	2	70.025	#NULL!	#NULL!	1793.1	#NULL!	10.2	3.7	13	18	72.3	45.4	3.93	2.51	0.94	2.34	4.7	141.8	105.6	2.35	10.37	172	419	27.3	37.2	8.155
DN+NDKD	1.66667	0	0	0	1	male	48	2021-05-31	36	#NULL!	0	0	0	100	73	82	2021-06-07	5.9	68.6	25.3	4.45	144	156	8	70.025	#NULL!	61	73.2	2	3.9	#NULL!	17	12	71.3	43.7	3.77	4.18	0.73	2.38	3.91	137.5	101.3	2.39	5.9	11.8	433	22.3	62.5	10.95
DN+NDKD	13.7667	#NULL!	#NULL!	#NULL!	#NULL!	male	50	2021-06-09	0	#NULL!	0	0	0	150	86	107.333	2021-06-16	9.27	73.4	20.5	4.87	147	239	#NULL!	34.3	34.4	524	524	2	168.38	#NULL!	28	22	73.8	43.9	4.79	1.14	1.16	3.28	3.83	140.4	102.8	2.3	6.8	106	399	24	70.1	10.89
DN+NDKD	13.4333	0	0	0	0	male	54	2021-07-22	36	#NULL!	0	0	0	161	104	123	2021-07-26	6.07	71.4	21.6	4.5	139	169	#NULL!	207.4	24.7	635	1460.5	2	676.5	0.3	15	18	65.8	42.6	5.05	1.43	1.31	2.65	4.15	141.1	103.2	2.25	5.6	98	333	26.3	75	7.73
DN+NDKD	3.03333	0	0	1	0	male	38	2021-08-02	0	#NULL!	0	0	0	133	91	105	2021-08-05	9.19	59.6	32.5	4.6	136	254	20	6.7	1.4	627	1316.7	2	522.3	#NULL!	25	17	69.4	44.8	6.79	10.59	0.78	1.73	3.83	132	97.2	2.22	9.31	220	507.7	14.4	31.6	28.26
DN+NDKD	11.2	0	0	1	0	male	46	2021-09-05	96	#NULL!	0	0	0	114	72	86	2021-09-08	10.88	67.7	24.7	5.42	161	221	7	64.875	#NULL!	1113	2671.2	2	1360.2	1.4	24	19	71.9	42.4	4.06	7.91	0.81	1.14	3.86	142.7	103	2.34	5.9	83	407	21.3	97	7.79
DN+NDKD	16.4446	0	0	0	0	male	57	2021-10-17	60	#NULL!	0	0	0	122	64	83.3333	2021-10-18	10.67	73.6	18.3	4.55	130	336	34	35.1	1164.7	5779	15603.3	1	1597.75	8.6	11	17	69.8	35.1	5.27	3.34	0.68	3.13	3.74	138.9	103.5	2.14	8.4	268	410	19.4	21.8	8.25
DN+NDKD	16.4446	0	0	1	0	male	43	2021-11-02	#NULL!	#NULL!	0	0	0	161	104	123	2021-11-03	6.34	61.6	30	3.95	120	156	#NULL!	1211.38	#NULL!	2649	5827.8	1	3474.9	#NULL!	17	15	67.2	39.7	4.82	2	0.83	3.2	4.59	143.5	107.2	2.16	9.87	223	416.7	22	30	5.28
DN+NDKD	0.566667	#NULL!	#NULL!	#NULL!	#NULL!	female	66	2021-11-14	0.33	#NULL!	0	0	0	91	57	68.3333	2021-11-15	5.41	54.3	33.1	4.31	130	228	#NULL!	10.3	87.4	#NULL!	7282.55	#NULL!	1915.35	#NULL!	31	31	73.9	45.6	4.72	2.05	0.81	3.25	4.01	140.6	101.9	2.33	6.2	102	471.1	24.6	49.5	7.58
DN+NDKD	9.13333	0	0	0	0	male	47	2021-11-22	60	#NULL!	1	0	0	162	99	120	2021-11-23	7.25	59.3	32.7	5.53	181	210	2	1212.12	#NULL!	3129	4693.5	1	1033.6	0.7	20	15	57.7	32.3	5.64	4.4	0.85	3.18	3.57	138.6	103.9	2.22	3.6	81	546	22.1	99.2	13.09
DN+NDKD	16.4446	0	0	1	1	male	56	2021-12-12	132	#NULL!	0	0	0	102	67	78.6667	2021-12-13	5.99	68.6	24.5	5.06	157	162	8	1212.12	#NULL!	1768	3005.6	2	1792.7	1.2	17	17	47.5	25.9	6.61	2.33	1.04	4.8	3.99	144.1	107.3	2.06	4.4	67	291.6	27.1	102.1	8.55
DN+NDKD	16.4446	0	0	1	0	male	40	2022-01-10	48	1	1	0	0	101	70	80.3333	2022-01-12	7.03	65.5	24.6	2.95	93	254	#NULL!	1212.12	#NULL!	3165	5064	1	3399	#NULL!	17	17	64.3	35.7	3.23	1.89	0.76	1.6	5.29	140.6	105.6	2.3	22.5	620	468	23.5	8.9	7.26
DN+NDKD	16.4446	1	1	1	0	male	72	2022-01-03	60	#NULL!	0	0	0	191	98	129	2022-01-12	6.11	79.6	11.9	2.47	67	252	#NULL!	1212.12	#NULL!	#NULL!	3159.75	#NULL!	3457.2	#NULL!	6	13	47.5	18.2	4.89	1.5	0.75	3.15	4.1	140.3	108.1	1.82	9.5	412	393	20.6	11.6	5.46
DN+NDKD	5.8	0	0	0	0	male	43	2022-01-13	72	#NULL!	0	0	0	129	85	99.6667	2022-01-17	6.89	74.6	17.4	4.25	127	238	23	1212.12	#NULL!	1495	1495	2	1411	1.9	40	65	52.7	27.6	7.61	1.33	2.08	4.63	4.27	139.9	102.7	2.14	8.81	99	361.4	26	80	6.94
DN+NDKD	7.13333	0	0	0	0	female	51	2022-01-09	12	#NULL!	0	0	0	164	86	112	2022-01-24	#NULL!	75.2	16.8	2.85	57	189	87	4793.4	8	2562	3074.4	2	3203.5	#NULL!	9	14	55.6	33	5.13	1.18	1.5075	2.965	3.89	139.5	99.1	2.17	10.7	405	447	23.2	10.4	6.43
DN+NDKD	4.13333	0	0	0	0	female	63	2022-02-07	24	#NULL!	0	0	0	116	68	84	2022-02-09	5.4	61.5	30	4.26	130	244	#NULL!	9.7	3	76	72.2	2	7.1	#NULL!	15	26	77.4	42.7	4.22	0.44	2.24	1.73	3.84	140.6	101.8	2.43	5.3	54	123	26.5	96.7	4.94
DN+NDKD	5.9	0	0	1	1	female	58	2022-02-08	120	#NULL!	0	0	0	129	83	98.3333	2022-02-09	7.56	67.9	19	4.57	129	194	18	17.2	105.2	1438	1581.8	2	797.2	2.1	14	17	66.6	38.5	3.8	1.45	0.96	2.35	4.33	141.7	103.8	2.39	9.72	120	457.2	24.2	43	11.4
DN+NDKD	3.96667	0	0	1	0	female	44	2022-02-10	12	#NULL!	0	0	0	94	63	73.3333	2022-02-14	7.2	70.9	1.67	5.01	114	399	#NULL!	8.7	13.9	4589	6883.5	1	3449.9	#NULL!	17	18	57.6	23.5	7.24	3.58	1.59	4.32	4.18	135.9	99	2.11	7.3	69	276	24	92.7	18.17
DN+NDKD	4.63333	0	0	0	0	female	55	2022-03-15	2	#NULL!	0	0	0	158	96	116.667	2022-03-16	5.88	54.2	32	5.01	140	247	44	12.5	3	5031	7949	1	2557.8	1	15	24	49.9	23.6	14.43	3.49	1.99	9.62	3.73	139.9	104.1	2.11	5.3	53	262	24.8	103	6.76
DN+NDKD	4.13333	0	0	1	1	male	62	2022-03-19	240	#NULL!	0	0	0	117	78	91	2022-03-21	7.94	80	13.6	3.67	111	271	#NULL!	7.9	2.1	204	571.2	2	344.3	#NULL!	46	29	72.1	39.9	4.51	1.76	0.99	2.79	4.59	136.5	100.1	2.39	10.2	153	433	23.2	41.4	16.58
DN+NDKD	4.5	0	0	0	0	male	57	2022-04-11	5	#NULL!	1	0	0	121	84	96.3333	2022-04-18	6.62	76.8	17.4	4.14	135	139	#NULL!	5.7	3.3	3156	3787.2	1	2832.5	#NULL!	18	19	57.2	29.3	6.56	2.61	1.21	3.61	4.24	138	103.7	2.04	7.2	102	316	23.6	70	11.97
DN+NDKD	3.56667	0	0	1	1	male	65	2022-04-23	0.33	#NULL!	0	0	0	109	73	85	2022-04-25	6.45	76.5	13.6	3.41	88	331	125	5.7	195.2	145	420.5	2	107.7	40.1	43	40	84.9	41.9	3.46	1.87	0.68	2.44	4.44	136.7	94.3	2.45	24.1	421	370	19.8	11.9	11.74
DN+NDKD	3.6	0	0	0	0	female	59	2022-05-13	36	#NULL!	0	0	1	113	73	86.3333	2022-05-18	5.07	63.3	21.9	4.21	126	243	#NULL!	7.475	#NULL!	40	104	2	11.5	#NULL!	18	18	76.5	43.4	3.24	3.9	1.22	1.26	4.51	138.3	102.4	2.37	7.7	155	316	22	31.4	6.71
DN+NDKD	1.3	1	1	1	1	male	57	2022-05-23	24	#NULL!	0	0	0	125	88	100.333	2022-05-25	7.34	76.6	13.4	3.64	113	182	#NULL!	7.475	#NULL!	678	406.8	2	62.1	#NULL!	21	18	60.1	33.3	3.37	2.31	0.9	1.39	4.05	137.1	103.1	2.25	10.9	124	402	23.5	55.2	10.06
DN+NDKD	2.36667	0	0	0	0	female	54	2022-05-29	24	#NULL!	0	0	0	147	99	115	2022-05-31	6.62	73.5	19.2	3.68	114	286	21	6.8	134.3	3092	3092.5	2	235.8	0.4	9	16	67.7	37.6	6.91	3.89	1.26	2.93	4.76	138.2	101.6	2.29	11	165	462	22.3	30.1	14.04
DN+NDKD	2.6	0	0	0	0	male	66	2022-05-29	120	#NULL!	1	0	0	153	105	121	2022-06-01	7.51	53.4	38.1	4.8	145	195	#NULL!	11.7	10.3	396	554.4	2	453.6	#NULL!	10	15	78.4	45.8	3.3	1.51	0.86	1.94	4.4	141.3	107	2.38	5.8	116	410	23.8	56.2	7.75
DN+NDKD	1.3	0	0	1	0	female	58	2022-06-12	12	#NULL!	0	0	1	111	80	90.3333	2022-06-13	4.96	55.4	33.3	3.74	114	204	6	12.25	#NULL!	649	1103.3	2	416	1.3	22	25	68.8	42.4	6	7.22	0.98	1.22	4.39	139.3	103.4	2.3	6.9	83	439	22	67.2	8.52
DN+NDKD	16.4446	0	0	1	0	male	53	2022-06-12	1	1	0	0	0	143	97	112.333	2022-06-14	5.41	68.3	21.1	4.02	122	210	10	2	3.6	430	602	2	202.4	#NULL!	17	13	64.6	40.8	3.83	1.64	0.93	2.45	4	140.1	107.8	2.13	6.2	114	320	19.4	62.9	9.06
DN+NDKD	1.43333	0	0	1	1	male	51	2022-06-20	84	#NULL!	0	0	0	97	73	81	2022-06-22	7.55	61.2	26.9	3.31	97	292	107	28.5	4.4	2825	6497.5	1	4700.9	#NULL!	12	13	58.6	25.5	6.31	4.26	0.8	3.9	4.81	137.3	106.3	2.07	12.05	223	377.2	20.4	28.3	14.64
DN+NDKD	16.4446	0	0	1	1	male	50	2022-06-25	180	1	0	0	1	181	109	133	2022-07-04	6.26	63.4	29.9	3.29	99	158	#NULL!	14.225	#NULL!	541	784.5	2	369.2	#NULL!	21	22	72.1	44.5	2.44	1.71	0.71	0.99	4.53	142.1	107.3	2.33	10.5	190	479	21.4	34.6	4.37
DN+NDKD	1.26667	0	0	1	0	male	59	2022-07-01	7	#NULL!	0	0	0	150	85	106.667	2022-07-04	7.59	69.2	22.5	4.35	130	292	7	14.225	#NULL!	632	695.2	2	264.6	3.2	17	25	73	43.8	4.1	2.04	1.3	2.4	4.14	143.4	108	2.34	9	134	497	20.3	49.6	5.66
DN+NDKD	16.4446	0	0	0	0	male	65	2022-07-11	120	1	0	0	1	155	103	120.333	2022-07-12	4.91	69.2	19.3	3.8	118	247	#NULL!	14.225	#NULL!	#NULL!	73.6	2	28.5	#NULL!	10	17	78.3	46.1	3.15	1.43	0.76	1.87	3.66	142.5	104.2	2.32	9.7	324	348	25.3	16.4	6.39
DN+NDKD	16.4446	0	0	1	0	male	49	2022-07-10	84	#NULL!	0	0	0	141	89	106.333	2022-07-13	8.26	69.1	21.7	4.93	153	213	2	4.4	2.8	2020	3030	2	1808.2	0.9	11	15	69	38.2	4.2	1.81	0.91	2.7	4.05	140.4	103.9	2.22	10.5	249	436	27.6	25.2	9.88
DN+NDKD	16.4446	0	0	1	0	male	42	2022-07-23	12	#NULL!	1	0	0	104	77	86	2022-07-27	10.01	75.5	13.7	4.36	119	206	#NULL!	14.175	#NULL!	67	127.3	2	7.3	#NULL!	68	25	64.7	40.8	3.05	1.96	1.02	1.47	3.79	141.6	101.9	2.28	12.5	162	515	26.6	44.4	10.92
DN+NDKD	16.4446	1	0	0	1	male	31	2022-06-13	24	1	1	0	0	121	75	90.3333	2022-06-15	5.99	65	26.7	3.61	96	398	#NULL!	22	9.7	366	1024.8	2	1153.9	#NULL!	5	14	73.2	38.8	2.94	2.17	0.79	1.65	5.02	140.7	104.9	2.4	9.3	120	409	22.3	69	10.56
DN+NDKD	16.4446	0	0	1	1	male	65	2022-06-26	180	#NULL!	0	0	0	116	72	86.6667	2022-06-28	5.67	59.3	27.7	3.49	104	232	25	1.8	0.3	134	242.5	2	31	4.7	18	31	63.4	36.6	3.26	6.34	0.73	1.58	4.38	140.8	104.8	2.23	10.6	225	189.6	25.4	25.4	11.51
DN+NDKD	16.4446	0	0	0	1	male	57	2021-02-19	312	1	0	1	0	141	76	97.6667	2021-02-25	8.14	76	10.8	3.73	116	250	47	8.6	8.2	3819	4773.8	1	3275.5	0.9	8	12	65.1	34.7	4.16	1.7	0.89	2.96	5.17	136.2	104.2	2.21	29.4	701	513	17.6	6.8	6.85
DN+NDKD	10.1667	0	0	0	0	male	73	2021-10-14	#NULL!	#NULL!	0	0	0	125	77	93	2021-10-11	5.19	70.5	20.6	3.92	121	191	#NULL!	7.875	#NULL!	522	469.8	2	260.4	18.5	9	14	73.7	35.6	3.13	0.9	0.83	1.84	4.6	137.9	103.3	2.3	6.9	148	371	22.5	39.9	7.58
DN+NDKD	13.4333	0	0	0	1	male	45	2021-04-24	180	1	0	0	0	140	109	119.333	2021-04-26	4.26	68.8	21.6	4.21	134	316	#NULL!	7.1	3.5	80	96	2	3628	#NULL!	17	21	82.6	52.1	4.44	1.07	1.23	3.03	4.82	143.7	106.4	2.39	7.35	160	381.7	26.4	44.2	7.57
DN+NDKD	0.4	0	0	0	1	female	27	2021-09-30	0.67	#NULL!	0	0	0	115	87	96.3333	2021-09-27	9.23	53	38.4	5.22	143	274	#NULL!	14	4.7	1949	4872.5	1	5791	#NULL!	42	35	72	43.3	4.58	5.06	0.87	2.15	3.77	140.7	103	2.46	6.6	68	413	20.6	106.3	9.47
DN+NDKD	15.4667	0	0	1	1	female	53	2021-02-21	36	#NULL!	0	0		172	106	128	2022-02-23	5.5	75.1	13.1	3.05	84	200	11	#NULL!	#NULL!	1726	3452	2	5185.1	2.3	18	27	50.6	29.4	3.68	0.64	1.46	1.7	3.59	142.2	110.4	2.11	7.84	48	264.1	19.7	107.9	6.83
DN+NDKD	15.3667	0	0	1	0	male	41	2021-03-09	36	#NULL!	0	0	0	153	82	105.667	2021-03-10	5.84	62.7	29.1	5.13	159	255	#NULL!	#NULL!	#NULL!	322	373.5	2	283.5	#NULL!	80	41	71.2	42.7	5.88	4.4	0.93	4.06	3.99	137	99.3	2.32	4.5	70	344	28.5	111.4	15.78
DN+NDKD	10.7	0	0	0	1	male	57	2021-02-22	36	#NULL!	1	0	0	170	94	119.333	2021-03-01	6.97	67.5	22.2	3.63	115	223	#NULL!	#NULL!	#NULL!	3176	5399.2	1	2546.8	#NULL!	19	20	52	26.7	5.9	1.2	1.03	5.18	4.54	142.8	112.4	2.01	18.31	273	428.6	23.3	21.3	4.71
[truncated: 22 more columns]
